# Supplementary material for: Associations ofKCNQ1Polymorphisms with the Risk of Type 2 Diabetes Mellitus: An Updated Meta-Analysis with Trial Sequential Analysis
Source: Hindawi journal article supplement (doi:10.1155/2020/7145139), 2020-07-06
Supplement: f1 [file 7145139.f1.pdf]

## ***Supplementary Material***

### **supplementary figure legends**

**supplementary Fig. 1** Forest plots of overall analysis between *KCNQ1*

polymorphisms and the risk of T2DM in homozygote comparison

**supplementary Fig. 2** Funnel plots of overall analysis between *KCNQ1*

polymorphisms and the risk of T2DM in homozygote comparison

**supplementary Fig. 3** Trial sequential analysis of the association between *KCNQ1*

polymorphisms and the risk of T2DM in allelic comparison

**supplementary Fig. 4** Genotype - based mRNA expression alteration for KCNQ1

rs2237892 polymorphism in adipose - subcutaneous based on data from the GTEx

portal database (<https://www.gtexportal.org/home/>)

**supplementary Fig. 5** Genotype - based mRNA expression alteration for KCNQ1

rs2283228 polymorphism in adipose - subcutaneous based on data from the GTEx

portal database (<https://www.gtexportal.org/home/>)

**supplementary Fig. 6** Genotype - based mRNA expression alteration for KCNQ1

rs231362 polymorphism in cells - cultured fibroblasts based on data from the GTEx

portal database (<https://www.gtexportal.org/home/>)

a

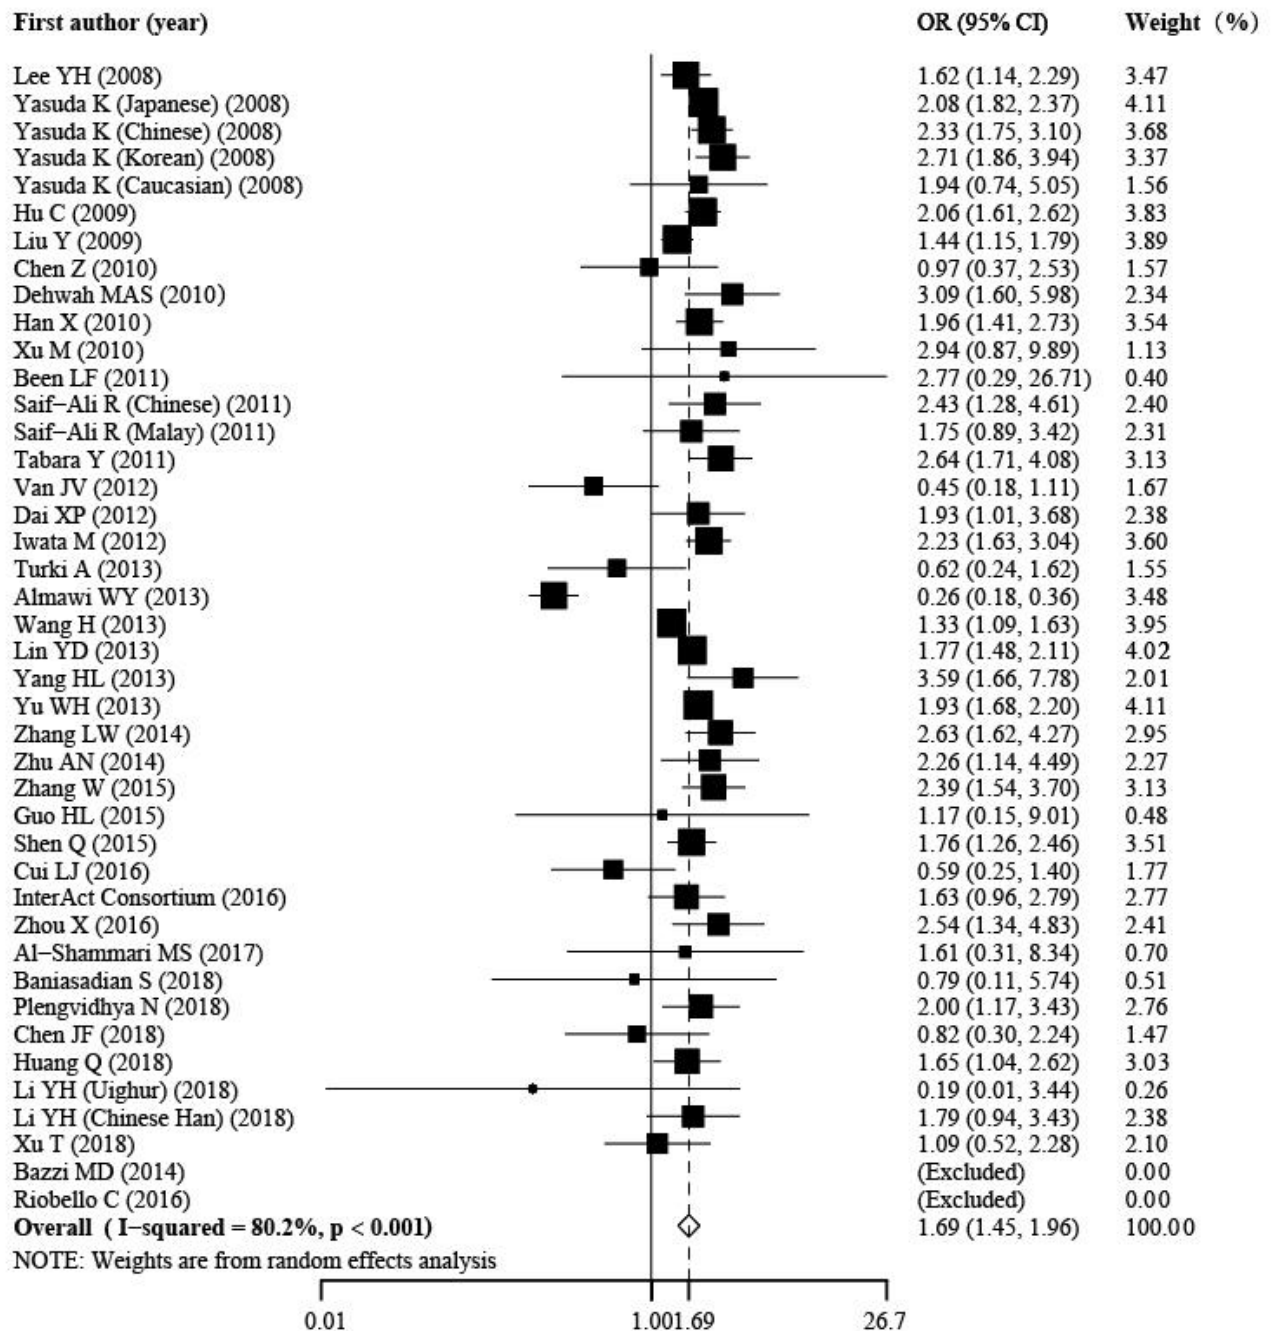

b

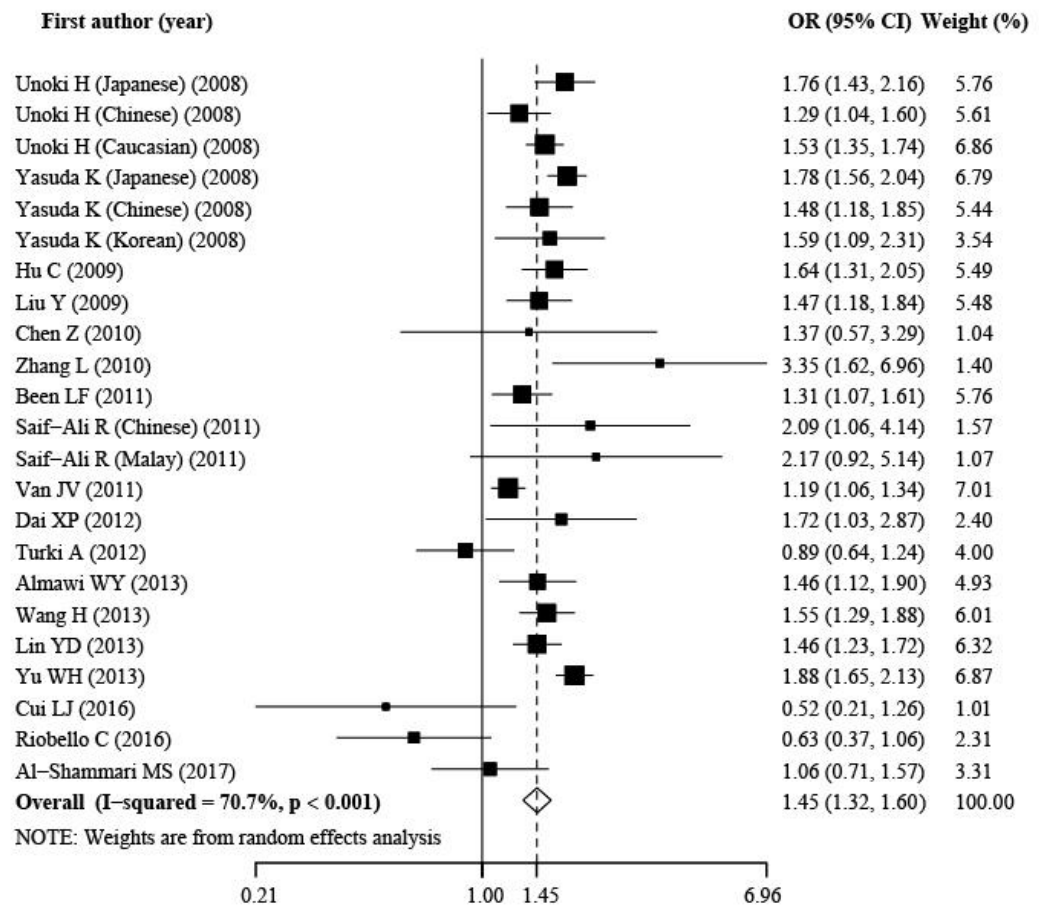

c

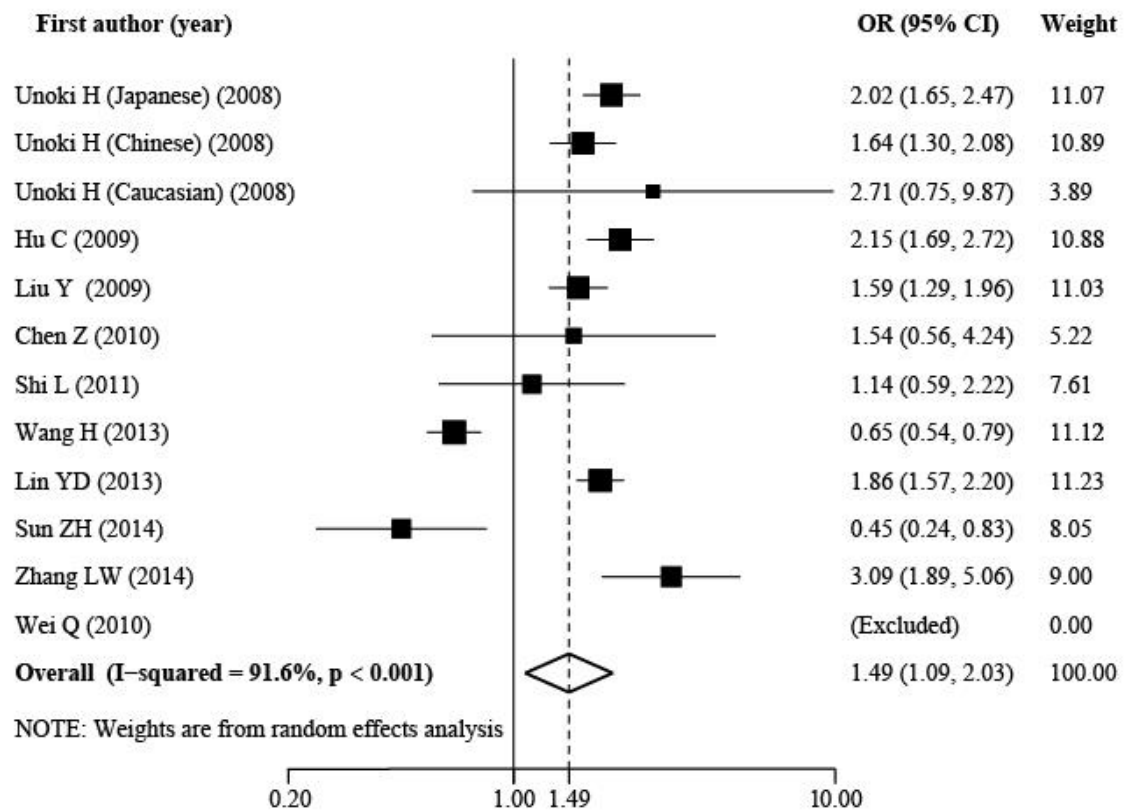

d

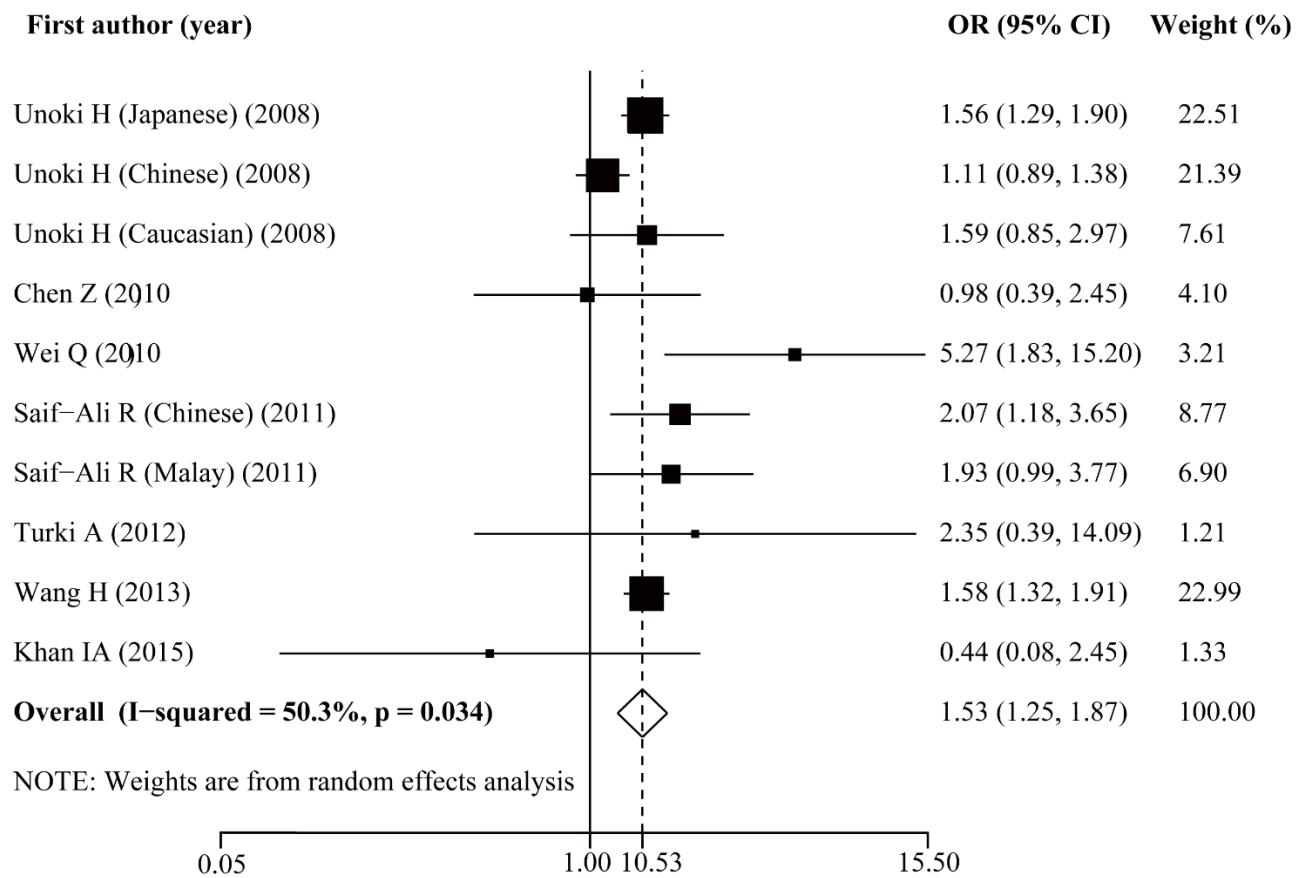

e

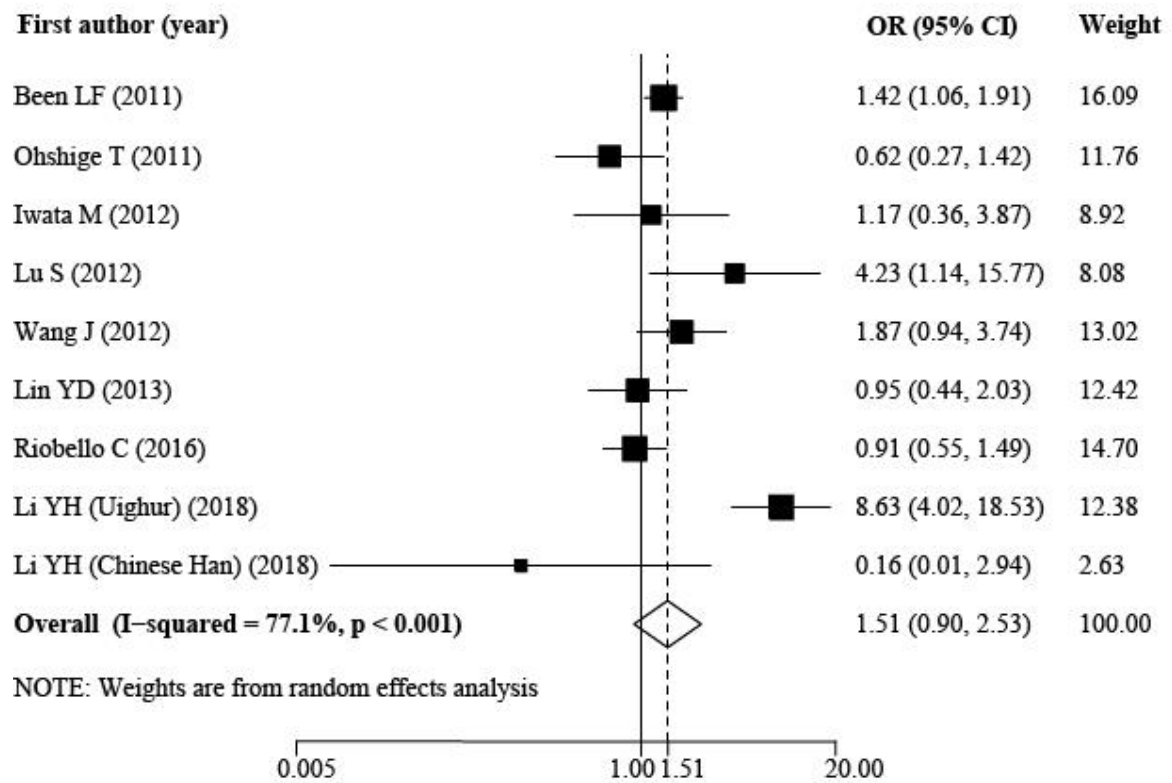

f

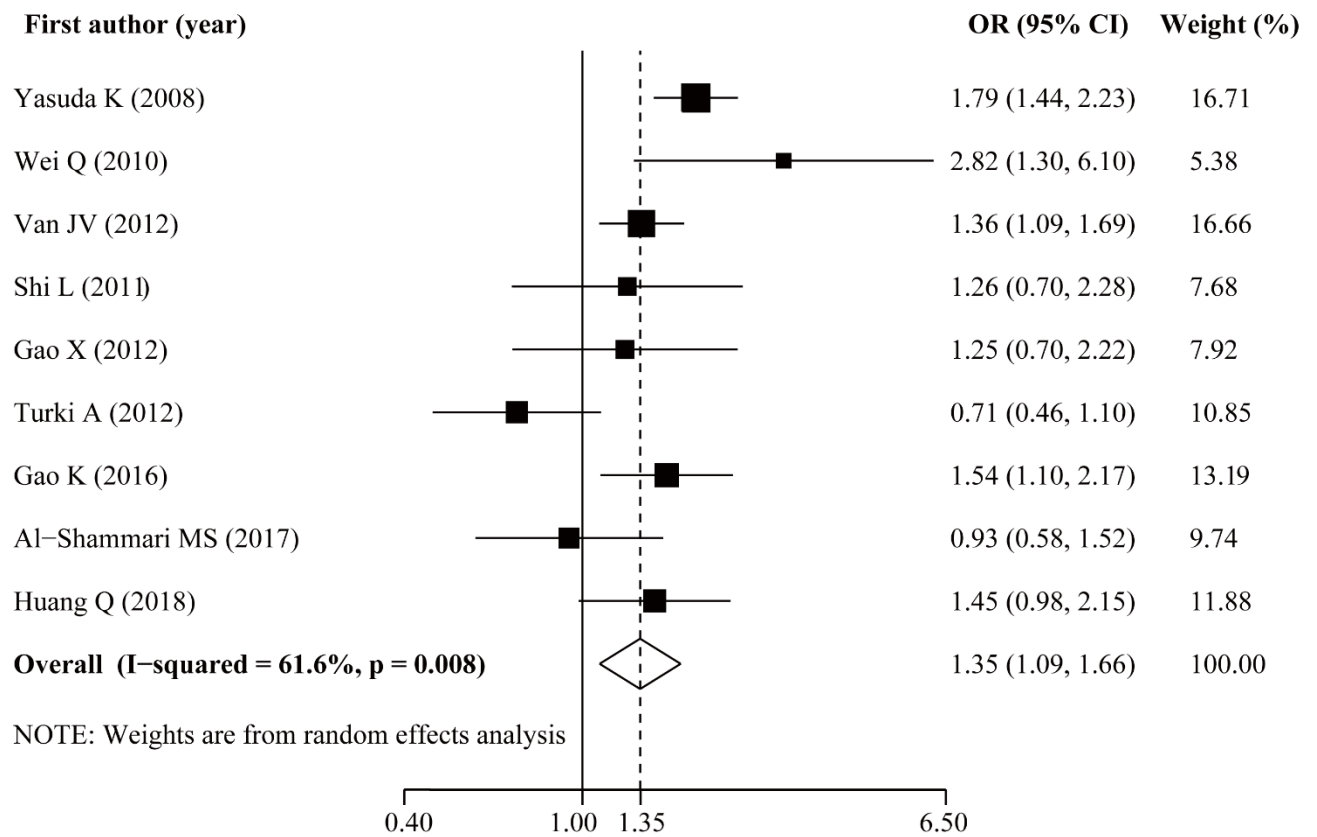

g

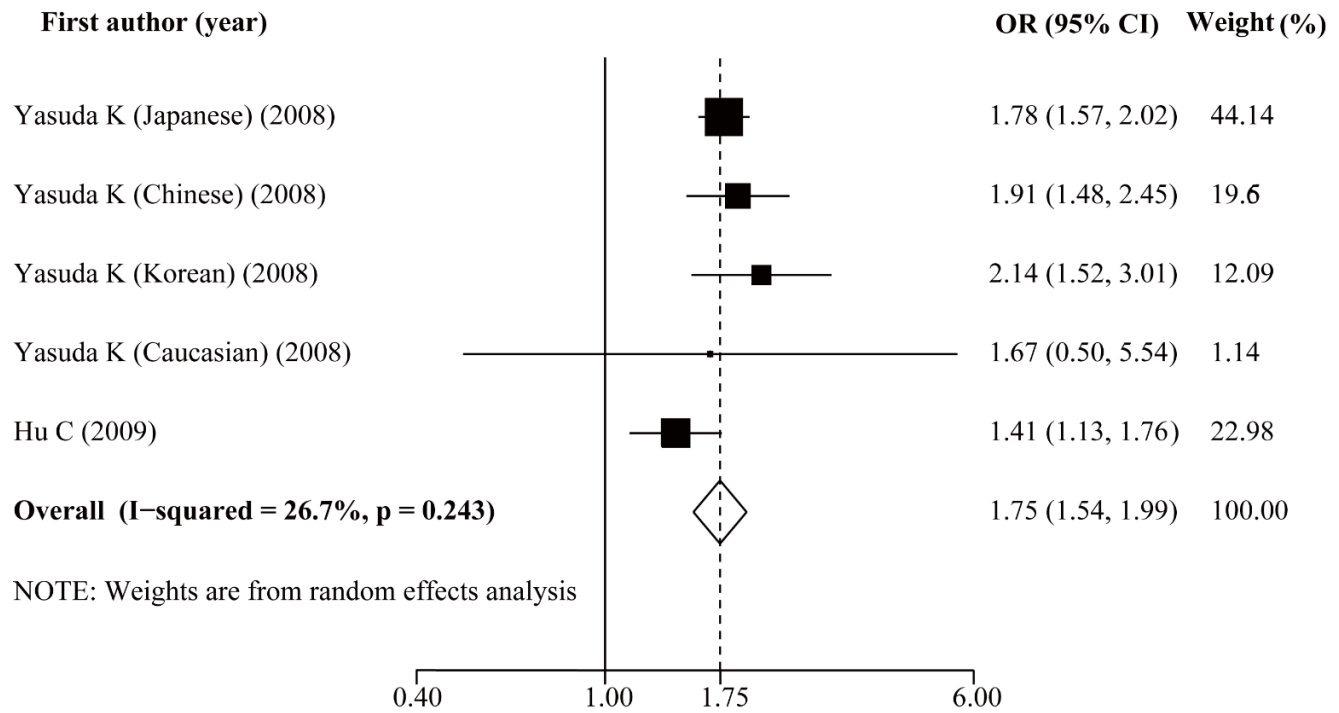

**supplementary Fig. 1** Forest plots of overall analysis between *KCNQ1* polymorphisms and the risk of T2DM in homozygote comparison  
a rs2237892, b rs2237895, c rs2237897, d rs2283228, e rs231362, f rs151290, g rs2074196



a

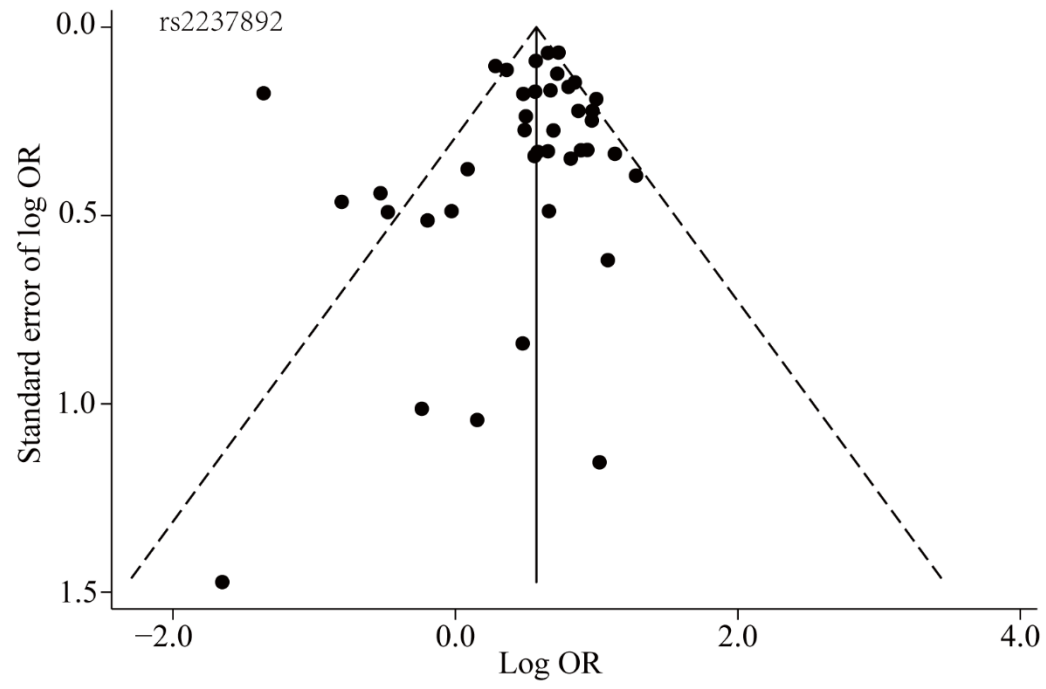

b

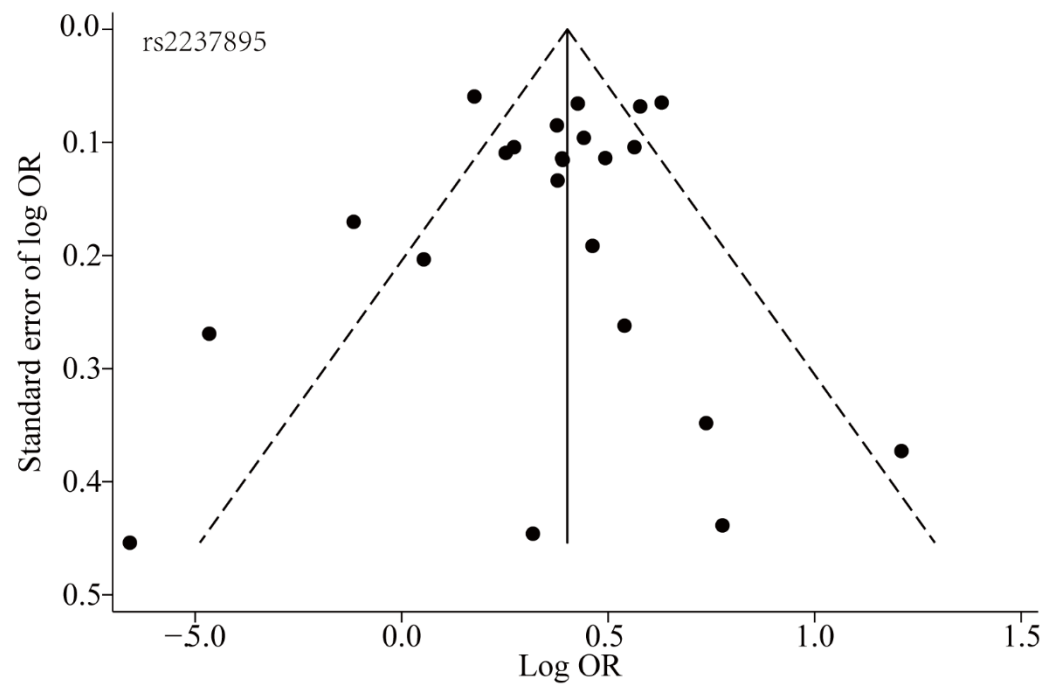

c

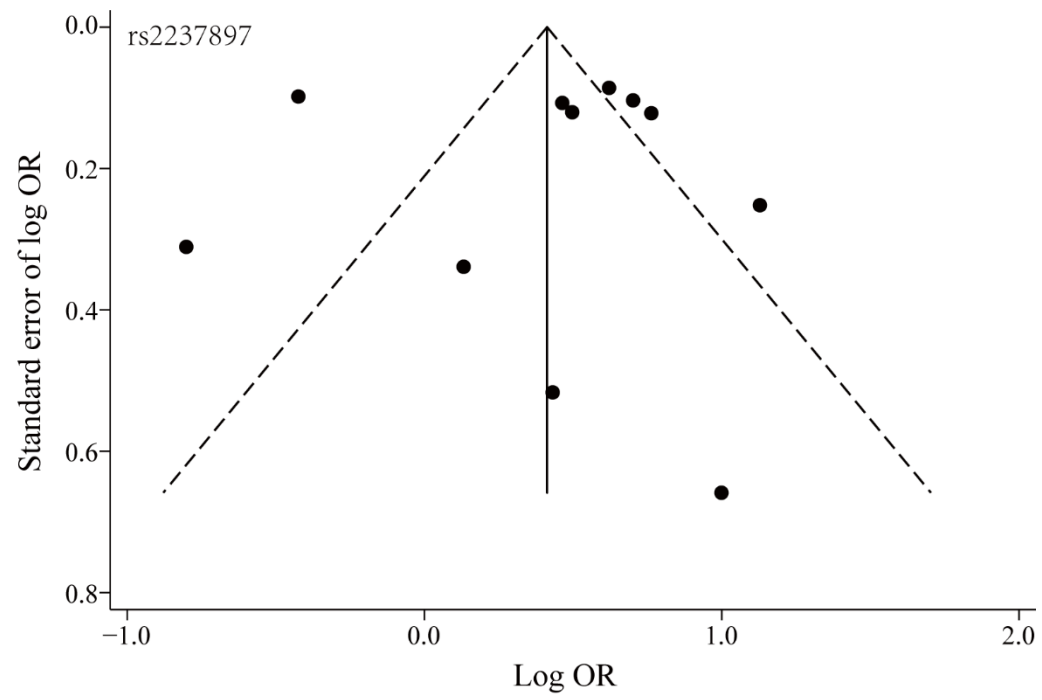

d

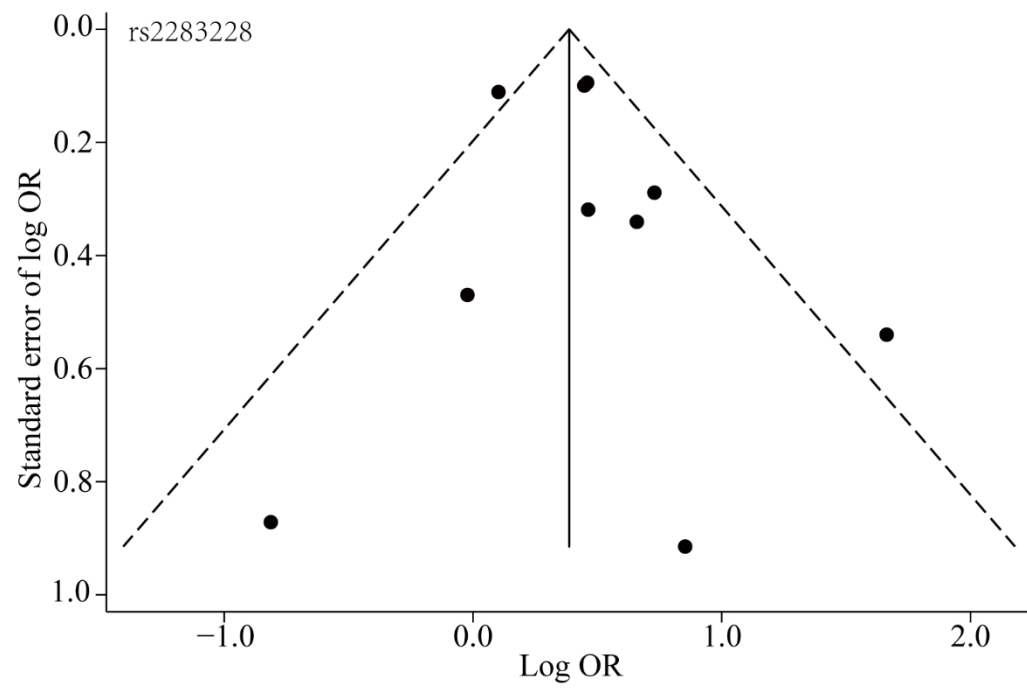

e

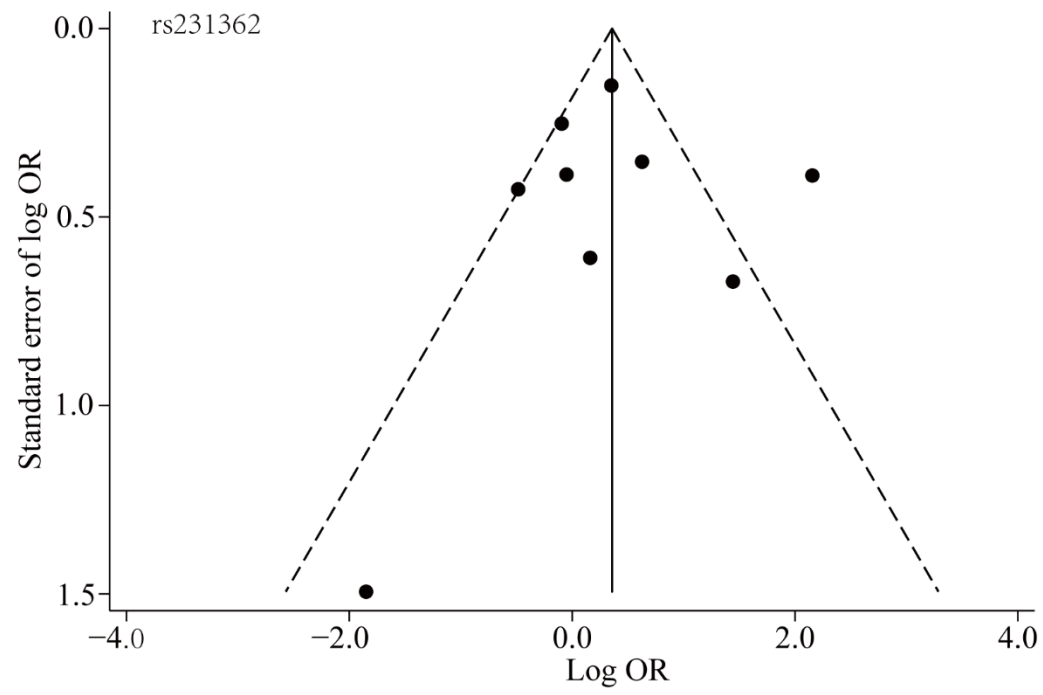

f

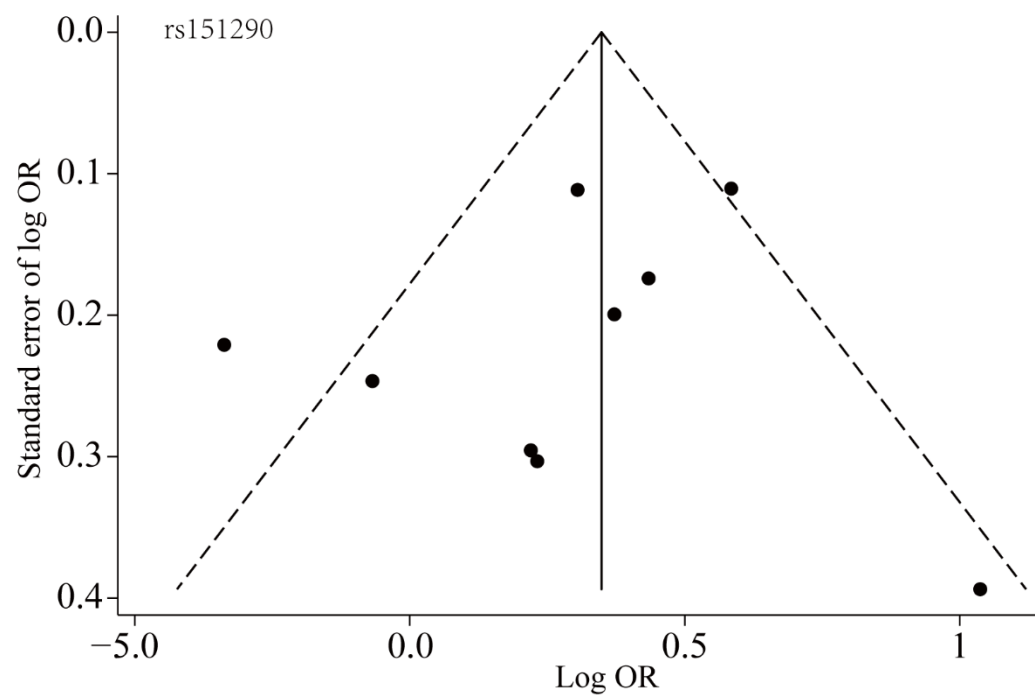

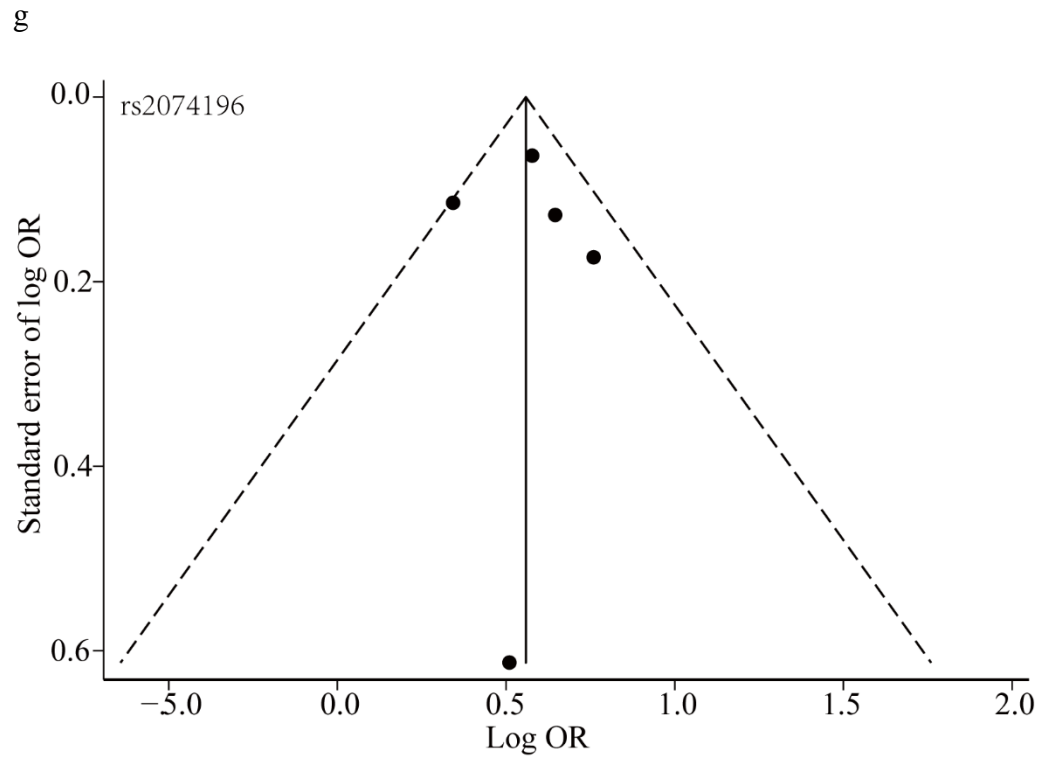

**supplementary Fig. 2** Funnel plots of overall analysis between *KCNQ1* polymorphisms and the risk of T2DM in homozygote comparison  
a rs2237892, b rs2237895, c rs2237897, d rs2283228, e rs231362, f rs151290, g rs2074196

a

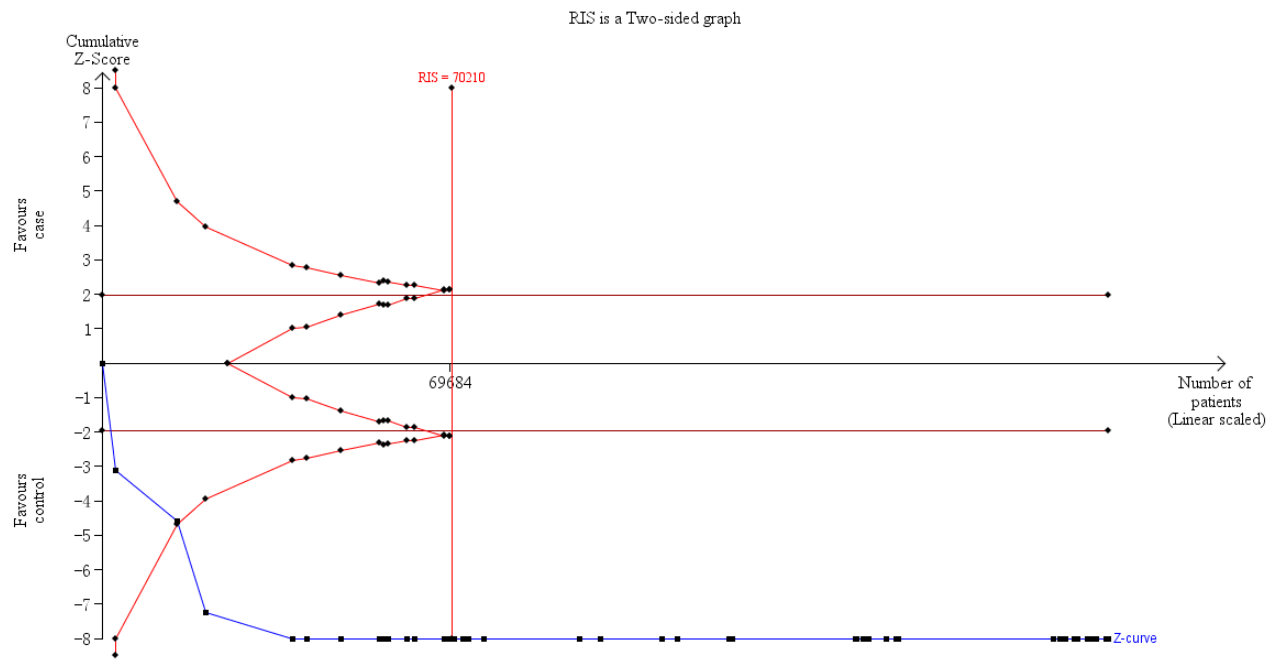

b

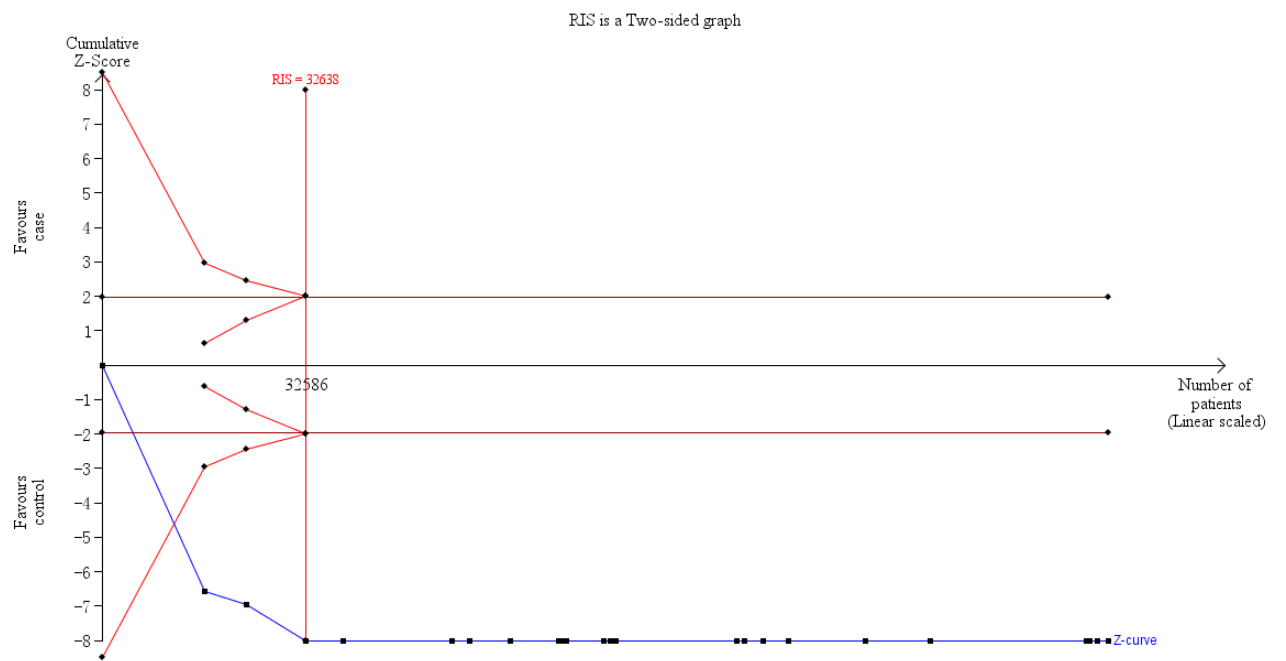

**C**

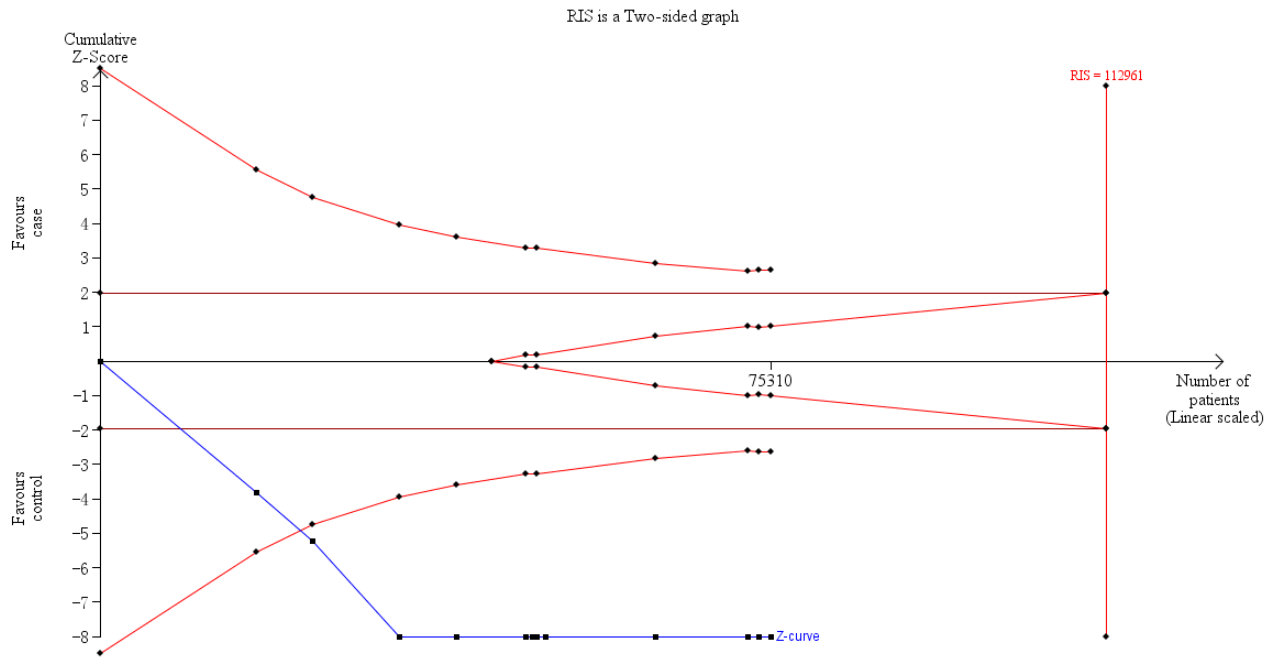

d

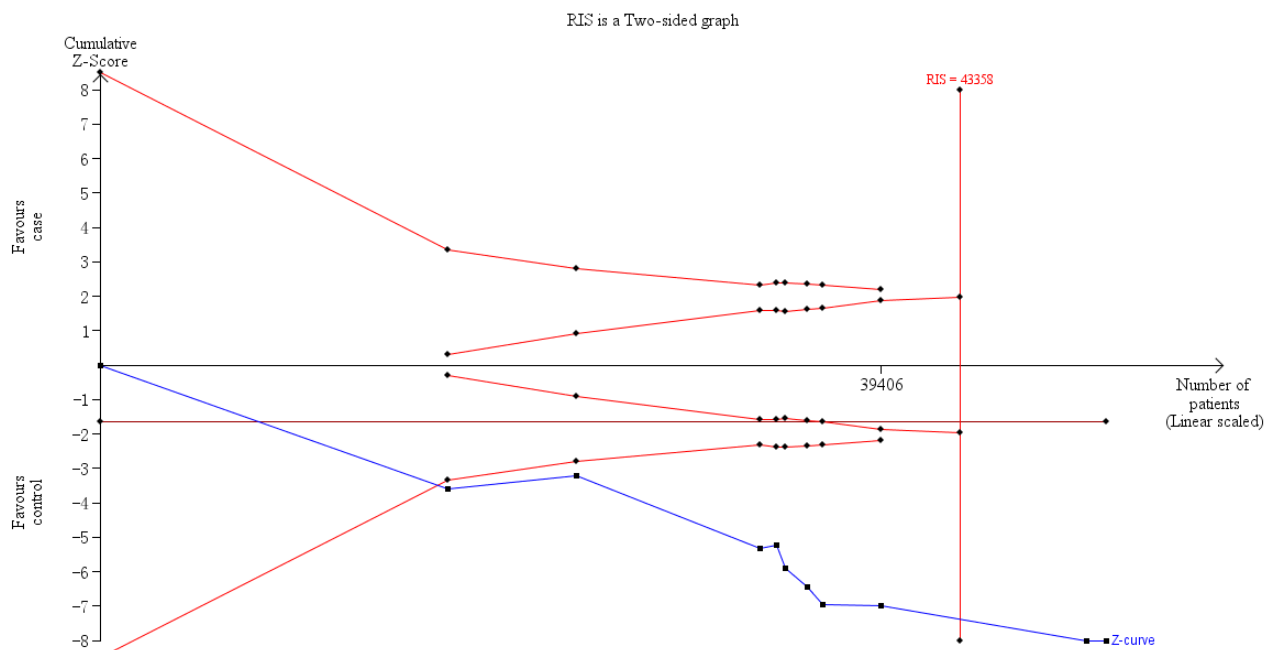

e

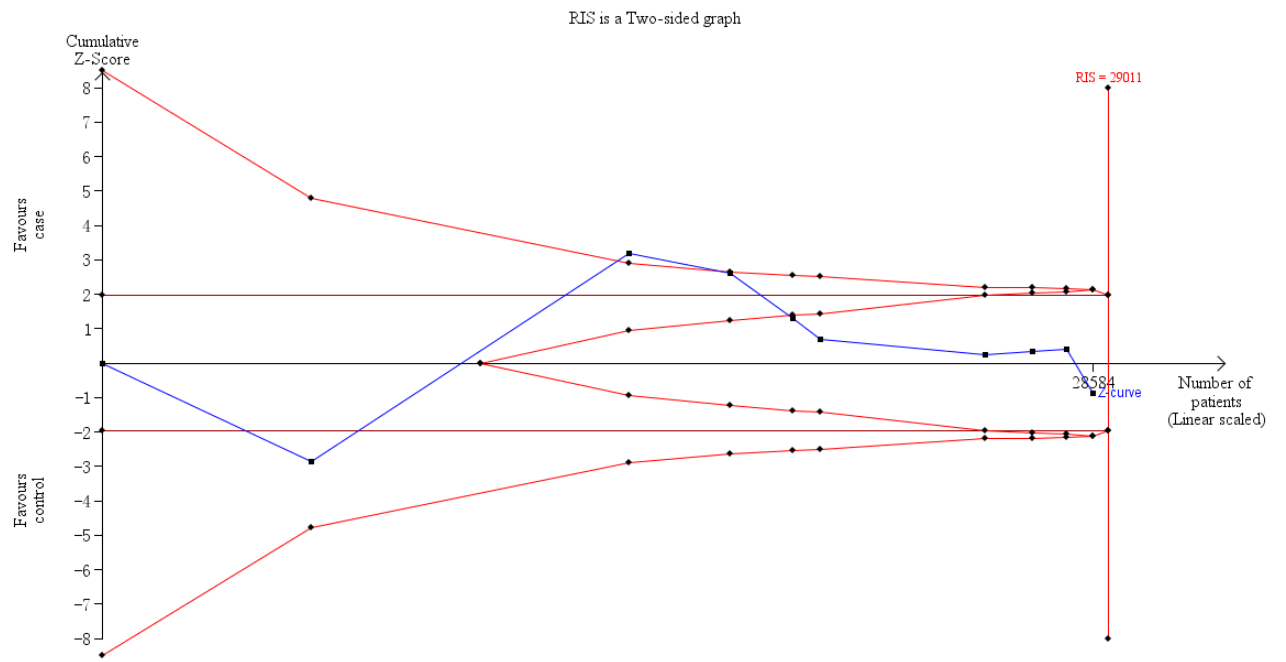

f

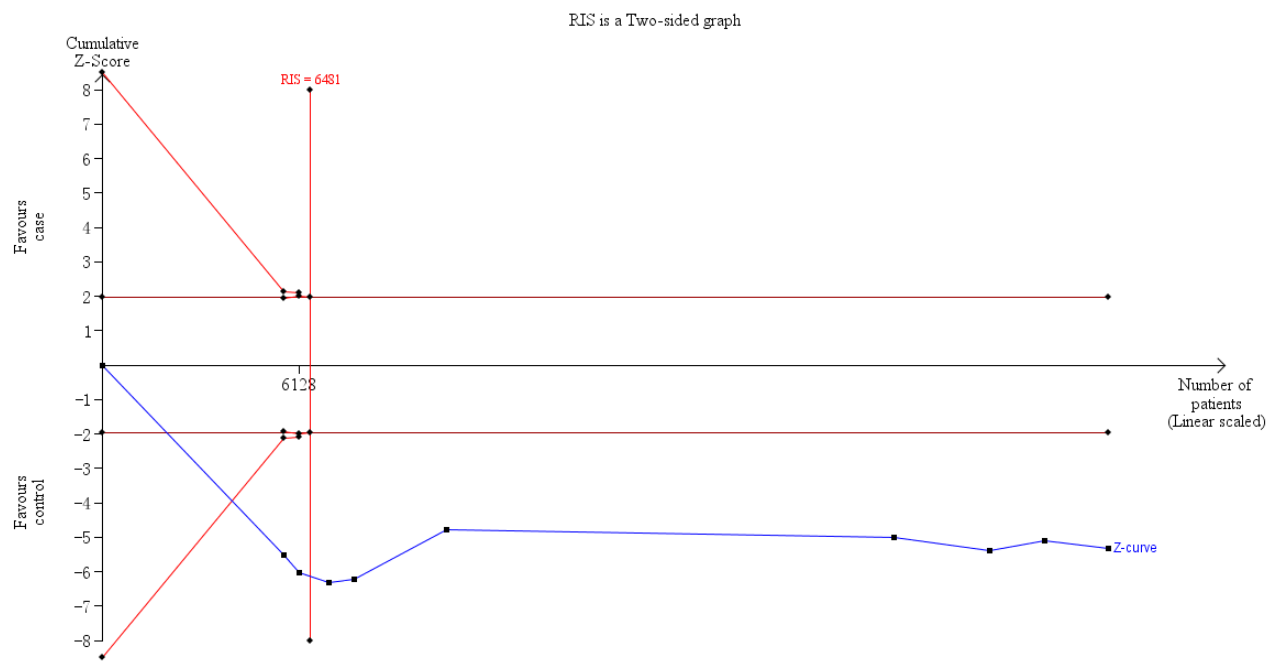

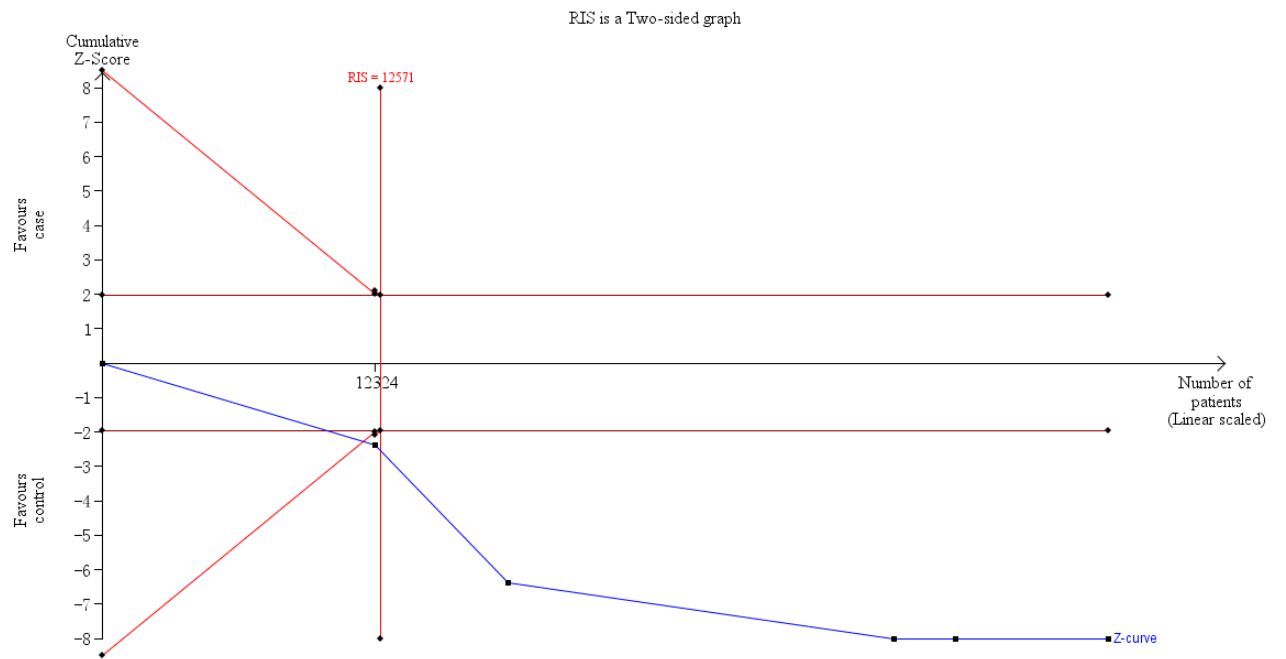

**supplementary Fig. 3** Trial sequential analysis of the association between *KCNQ1* polymorphisms and the risk of T2DM in allelic comparison  
a rs2237892, b rs2237895, c rs2237897, d rs2283228, e rs231362, f rs151290, g rs2074196



## chr11\_2818521\_C\_T\_b38

### Adipose - Subcutaneous

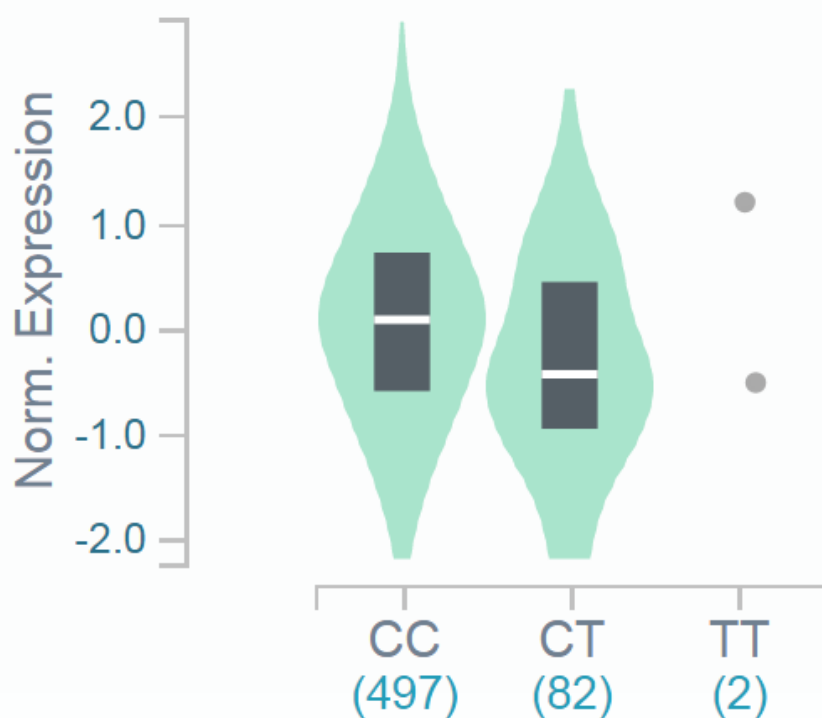

**supplementary Fig. 4** Genotype - based mRNA expression alteration for KCNQ1 rs2237892 polymorphism in adipose - subcutaneous based on data from the GTEx portal database ([https://www. gtexportal.org/home/](https://www.gtexportal.org/home/))

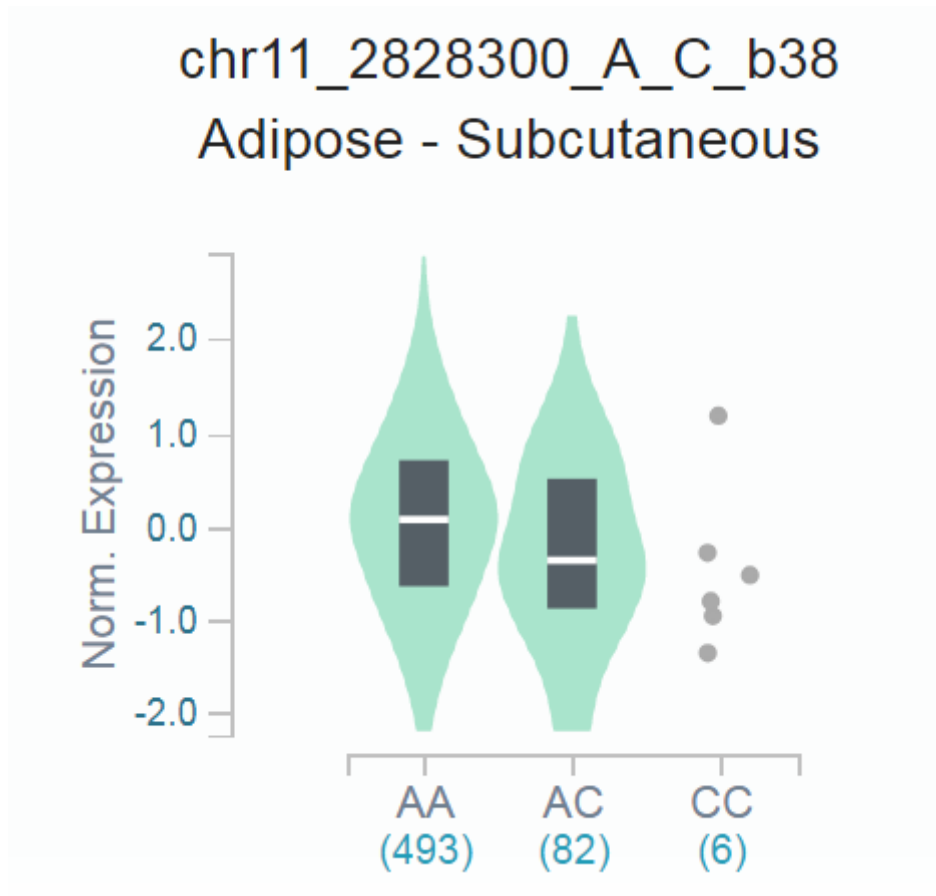

**supplementary Fig. 5** Genotype - based mRNA expression alteration for KCNQ1 rs2283228 polymorphism in adipose - subcutaneous based on data from the GTEx portal database ([https://www. gtexportal.org/home/](https://www.gtexportal.org/home/))

chr11\_2670241\_A\_G\_b38

Cells - Cultured fibroblasts

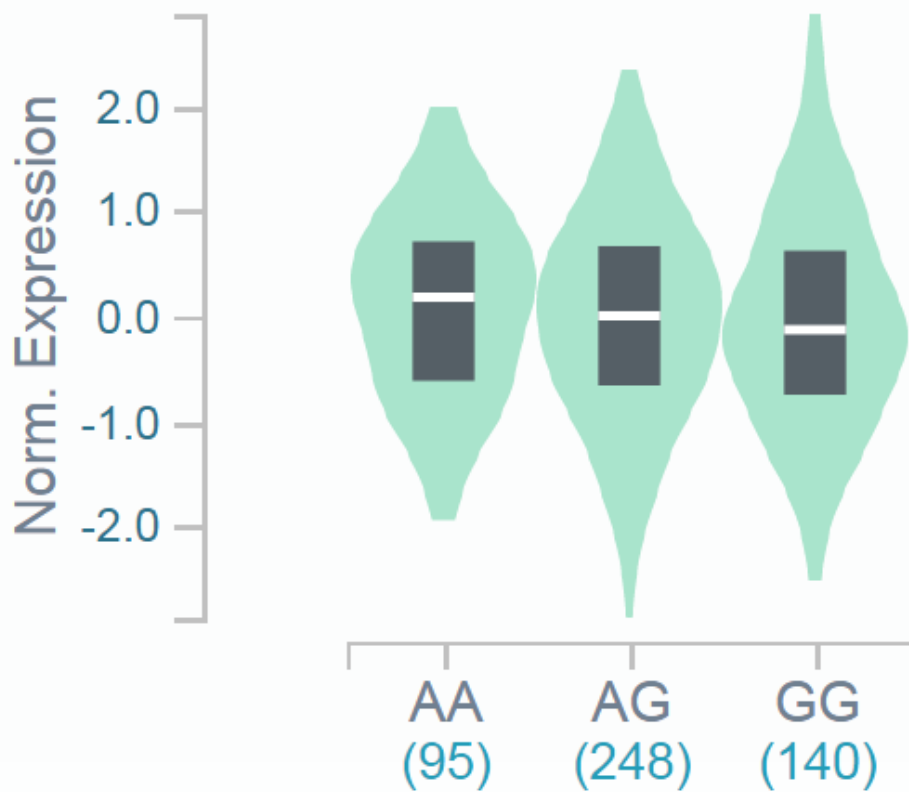

**supplementary Fig. 6** Genotype - based mRNA expression alteration for KCNQ1 rs231362 polymorphism in cells - cultured fibroblasts based on data from the GTEx portal database (<https://www.gtexportal.org/home/>)

## ***Supplementary Material***

### **supplementary table legends**

**supplemental Table 1** Score of quality assessment

**supplementary Table 2** *KCNQ1* polymorphisms genotype distribution among T2DM cases and controls of the included studies

**supplemental Table 3** Stratified analysis of *KCNQ1* gene seven polymorphisms on T2DM

**supplemental Table 4** The meta-regression analysis of *KCNQ1* gene homozygous on T2DM

**supplementary Table 5** Publication bias tests (Egger's funnel plot for publication bias test) for *KCNQ1* gene seven polymorphisms

**supplemental Table 1** Score of quality assessment

| <b>Criteria</b>                                   | <b>Score</b> |
|---------------------------------------------------|--------------|
| Representativeness of case                        |              |
| Selected from population                          | 2            |
| Selected from hospital                            | 1            |
| No method of selection described                  | 0            |
| Representativeness of control                     |              |
| Population-based                                  | 3            |
| Blood donors                                      | 2            |
| Hospital-based                                    | 1            |
| Not described                                     | 0            |
| Ascertainment of T2D case                         |              |
| Glucose confirmation                              | 2            |
| By patient medical record                         | 1            |
| Not described                                     | 0            |
| Control selection                                 |              |
| Controls matched with cases by age and sex        | 2            |
| Controls matched with cases only by age or by sex | 1            |
| Not matched or not described                      | 0            |
| Genotyping examination                            |              |
| Genotyping done blindly and quality control       | 2            |
| Only genotyping done blindly or quality control   | 1            |
| Unblinded and without quality control             | 0            |
| HWE                                               |              |
| HWE controls                                      | 1            |
| HWE-deviated controls                             | 0            |
| Total sample size                                 |              |
| > 1000                                            | 3            |
| 501 - 1000                                        | 2            |
| 201 - 500                                         | 1            |
| ≤ 200                                             | 0            |

**supplementary Table 2** *KCNQ1* polymorphisms genotype distribution among T2DM cases and controls of the included studies

| First author         | Year | Cases |       |     |                         | Controls |       |     |                         | P<br>(HWE)       |
|----------------------|------|-------|-------|-----|-------------------------|----------|-------|-----|-------------------------|------------------|
|                      |      | WW    | WM    | MM  | MAF<br>(%) <sup>1</sup> | WW       | WM    | MM  | MAF<br>(%) <sup>a</sup> |                  |
| rs2237892            |      |       |       |     |                         |          |       |     |                         |                  |
| Lee YH               | 2008 | 389   | 377   | 99  | 33.2                    | 182      | 239   | 75  | 39.2                    | 0.811            |
| Yasuda K (Japanese)  | 2008 | 1980  | 1878  | 457 | 32.4                    | 1582     | 2025  | 758 | 40.6                    | <b>0.012</b>     |
| Yasuda K (Chinese)   | 2008 | 673   | 604   | 79  | 28.1                    | 633      | 734   | 173 | 35.1                    | 0.067            |
| Yasuda K (Korean)    | 2008 | 334   | 366   | 52  | 31.3                    | 237      | 291   | 100 | 39.1                    | 0.500            |
| Yasuda K (Caucasian) | 2008 | 2466  | 287   | 6   | 5.4                     | 2968     | 444   | 14  | 6.9                     | 0.548            |
| Hu C                 | 2009 | 947   | 643   | 129 | 26.2                    | 707      | 816   | 198 | 35.2                    | 0.104            |
| Liu Y                | 2009 | 902   | 813   | 165 | 30.4                    | 853      | 919   | 224 | 34.2                    | 0.318            |
| Chen Z               | 2010 | 27    | 24    | 6   | 31.6                    | 162      | 144   | 35  | 31.4                    | 0.720            |
| Dehwah MAS           | 2010 | 115   | 92    | 16  | 27.8                    | 79       | 88    | 34  | 38.8                    | 0.268            |
| Han X                | 2010 | 525   | 396   | 69  | 27.0                    | 415      | 437   | 107 | 33.9                    | 0.616            |
| Xu M                 | 2010 | 30    | 33    | 3   | 29.5                    | 272      | 300   | 80  | 35.3                    | 0.846            |
| Been LF              | 2011 | 1392  | 36    | 1   | 1.3                     | 1505     | 68    | 3   | 2.3                     | <b>0.019</b>     |
| Saif-Ali R (Chinese) | 2011 | 183   | 99    | 18  | 22.5                    | 113      | 90    | 27  | 31.3                    | 0.171            |
| Saif-Ali R (Malay)   | 2011 | 135   | 79    | 20  | 25.4                    | 81       | 75    | 21  | 33.1                    | 0.572            |
| Tabara Y             | 2011 | 243   | 206   | 44  | 29.8                    | 136      | 193   | 65  | 41.0                    | 0.803            |
| Van JV               | 2011 | 4149  | 348   | 14  | 4.2                     | 4638     | 507   | 7   | 5.1                     | 0.073            |
| Dai XP               | 2012 | 233   | 112   | 22  | 21.3                    | 110      | 82    | 20  | 28.8                    | 0.412            |
| Iwata M              | 2012 | 342   | 300   | 82  | 32.0                    | 283      | 329   | 151 | 41.3                    | <b>0.002</b>     |
| Turki A              | 2013 | 763   | 106   | 14  | 7.6                     | 528      | 57    | 6   | 5.8                     | <b>0.003</b>     |
| Almawi WY            | 2013 | 500   | 371   | 124 | 31.1                    | 800      | 225   | 51  | 15.2                    | <b>&lt;0.001</b> |
| Wang H               | 2013 | 1332  | 998   | 203 | 27.7                    | 1210     | 1188  | 245 | 31.7                    | 0.055            |
| Lin YD               | 2013 | 1491  | 1174  | 234 | 28.3                    | 1433     | 1431  | 397 | 34.1                    | 0.174            |
| Yang HL              | 2013 | 123   | 87    | 12  | 25.0                    | 60       | 59    | 21  | 36.1                    | 0.308            |
| Yu WH                | 2013 | 4401  | 3424  | 620 | 27.6                    | 1626     | 1803  | 441 | 34.7                    | 0.080            |
| Bazzi MD             | 2014 | 71    | 7     | 0   | 4.5                     | 89       | 7     | 0   | 3.6                     | 0.711            |
| Zhang LW             | 2014 | 182   | 131   | 36  | 29.1                    | 104      | 142   | 54  | 41.7                    | 0.649            |
| Zhu AN               | 2014 | 104   | 116   | 14  | 30.8                    | 105      | 94    | 32  | 34.2                    | 0.145            |
| Zhang W              | 2015 | 274   | 217   | 39  | 27.8                    | 194      | 192   | 66  | 35.8                    | 0.104            |
| Guo HL               | 2015 | 7     | 21    | 2   | 41.7                    | 9        | 18    | 3   | 40.0                    | 0.171            |
| Shen Q               | 2015 | 441   | 374   | 66  | 28.7                    | 395      | 382   | 104 | 33.5                    | 0.430            |
| Cui LJ               | 2016 | 39    | 46    | 15  | 38.0                    | 53       | 35    | 12  | 29.5                    | 0.113            |
| InterAct Consortium  | 2016 | 6148  | 701   | 20  | 5.4                     | 7721     | 946   | 41  | 5.9                     | <b>0.040</b>     |
| Riobello C           | 2016 | 155   | 25    | 0   | 6.9                     | 450      | 51    | 0   | 5.1                     | 0.230            |
| Zhou X               | 2016 | 148   | 136   | 21  | 29.2                    | 72       | 102   | 26  | 38.5                    | 0.276            |
| Al-Shammari MS       | 2017 | 319   | 9     | 2   | 2.0                     | 496      | 15    | 5   | 2.4                     | <b>&lt;0.001</b> |
| Baniasadian S        | 2018 | 67    | 8     | 2   | 7.8                     | 85       | 3     | 2   | 3.9                     | <b>&lt;0.001</b> |
| Plengvidhya N        | 2018 | 285   | 192   | 23  | 23.8                    | 254      | 205   | 41  | 28.7                    | 0.968            |
| Chen JF              | 2018 | 34    | 42    | 8   | 34.5                    | 57       | 36    | 11  | 27.9                    | 0.155            |
| Huang Q              | 2018 | 250   | 220   | 36  | 28.9                    | 215      | 231   | 51  | 33.5                    | 0.336            |
| Li YH (Uighur)       | 2018 | 210   | 68    | 6   | 14.1                    | 84       | 15    | 0   | 7.6                     | 0.415            |
| Li YH (Chinese Han)  | 2018 | 144   | 128   | 21  | 29.0                    | 88       | 97    | 23  | 34.4                    | 0.628            |
| Xu T                 | 2018 | 31    | 45    | 24  | 46.5                    | 32       | 41    | 27  | 47.5                    | 0.075            |
| rs2237895            |      |       |       |     |                         |          |       |     |                         |                  |
| Unoki H (Japanese)   | 2008 | 1,225 | 1,633 | 577 | 40.6                    | 567      | 580   | 152 | 34.0                    | 0.843            |
| Unoki H (Chinese)    | 2008 | 574   | 709   | 214 | 38.0                    | 801      | 848   | 232 | 34.9                    | 0.744            |
| Unoki H (Caucasian)  | 2008 | 1,082 | 1,854 | 750 | 45.5                    | 1,578    | 2,203 | 714 | 40.4                    | 0.233            |
| Yasuda K (Japanese)  | 2008 | 1546  | 2087  | 692 | 40.1                    | 1939     | 1926  | 487 | 33.3                    | 0.791            |
| Yasuda K (Chinese)   | 2008 | 506   | 698   | 212 | 39.6                    | 684      | 697   | 194 | 34.4                    | 0.426            |
| Yasuda K (Korean)    | 2008 | 305   | 359   | 86  | 35.4                    | 304      | 270   | 54  | 30.1                    | 0.585            |
| Hu C                 | 2009 | 636   | 759   | 234 | 37.7                    | 770      | 699   | 173 | 31.8                    | 0.444            |
| Liu Y                | 2009 | 790   | 886   | 209 | 34.6                    | 942      | 883   | 169 | 30.6                    | 0.059            |
| Chen Z               | 2010 | 23    | 26    | 8   | 36.8                    | 162      | 138   | 41  | 32.3                    | 0.172            |

|                      |      |       |       |      |      |       |      |      |      |                  |
|----------------------|------|-------|-------|------|------|-------|------|------|------|------------------|
| Zhang L              | 2010 | 25    | 36    | 39   | 57.0 | 43    | 34   | 20   | 38.1 | <b>0.011</b>     |
| Been LF              | 2011 | 450   | 677   | 297  | 44.6 | 565   | 722  | 284  | 41.1 | <b>0.045</b>     |
| Saif-Ali R (Chinese) | 2011 | 123   | 147   | 30   | 34.5 | 120   | 96   | 14   | 27.0 | 0.364            |
| Saif-Ali R (Malay)   | 2011 | 123   | 91    | 20   | 28.0 | 107   | 62   | 8    | 22.0 | 0.795            |
| Van JV               | 2011 | 1522  | 2158  | 869  | 42.8 | 1803  | 2516 | 863  | 40.9 | 0.768            |
| Dai XP               | 2012 | 134   | 168   | 65   | 40.6 | 99    | 87   | 28   | 33.4 | 0.207            |
| Turki A              | 2013 | 350   | 429   | 107  | 36.3 | 233   | 261  | 80   | 36.7 | 0.614            |
| Almawi WY            | 2013 | 324   | 497   | 174  | 42.5 | 413   | 511  | 152  | 37.9 | 0.763            |
| Wang H               | 2013 | 1038  | 1190  | 305  | 35.5 | 1270  | 1133 | 240  | 30.5 | 0.576            |
| Lin YD               | 2013 | 1233  | 1289  | 374  | 35.2 | 1546  | 1390 | 322  | 31.2 | 0.711            |
| Yu WH                | 2013 | 3242  | 4026  | 1285 | 38.6 | 1837  | 1705 | 388  | 31.6 | 0.793            |
| Cui LJ               | 2016 | 40    | 49    | 11   | 35.5 | 32    | 51   | 17   | 42.5 | 0.664            |
| Riobello C           | 2016 | 65    | 90    | 25   | 38.9 | 155   | 251  | 95   | 44.0 | 0.711            |
| Al-Shammari MS       | 2017 | 122   | 150   | 58   | 40.3 | 202   | 223  | 91   | 39.2 | <b>0.033</b>     |
| <b>rs2237897</b>     |      |       |       |      |      |       |      |      |      |                  |
| Unoki H (Japanese)   | 2008 | 1,615 | 1,574 | 333  | 31.8 | 476   | 646  | 198  | 39.5 | 0.379            |
| Unoki H (Chinese)    | 2008 | 680   | 621   | 132  | 30.9 | 749   | 747  | 239  | 35.3 | <b>0.017</b>     |
| Unoki H (Caucasian)  | 2008 | 3,643 | 245   | 3    | 3.2  | 4,473 | 405  | 10   | 4.3  | 0.793            |
| Hu C                 | 2009 | 832   | 654   | 131  | 28.3 | 660   | 740  | 223  | 36.5 | 0.498            |
| Liu Y                | 2009 | 873   | 822   | 183  | 31.6 | 813   | 912  | 271  | 36.4 | 0.549            |
| Chen Z               | 2010 | 25    | 27    | 5    | 32.5 | 156   | 137  | 48   | 34.2 | <b>0.048</b>     |
| Wei Q                | 2010 | 70    | 63    | 0    | 23.7 | 26    | 80   | 0    | 37.7 | <b>&lt;0.001</b> |
| Shi L                | 2011 | 93    | 59    | 19   | 28.4 | 103   | 161  | 24   | 36.3 | <b>&lt;0.001</b> |
| Wang H               | 2013 | 211   | 1054  | 1268 | 70.9 | 302   | 1154 | 1187 | 66.7 | 0.397            |
| Lin YD               | 2013 | 1440  | 1196  | 267  | 29.8 | 1308  | 1503 | 451  | 36.9 | 0.562            |
| Sun ZH               | 2014 | 156   | 131   | 34   | 31.0 | 184   | 143  | 18   | 25.9 | 0.144            |
| Zhang LW             | 2014 | 167   | 147   | 35   | 31.1 | 88    | 155  | 57   | 44.8 | 0.441            |
| <b>rs231362</b>      |      |       |       |      |      |       |      |      |      |                  |
| Been LF              | 2011 | 860   | 486   | 82   | 22.8 | 887   | 586  | 120  | 25.9 | 0.092            |
| Ohshige T            | 2011 | 2310  | 460   | 18   | 8.9  | 1666  | 355  | 27   | 10.0 | 0.106            |
| Iwata M              | 2012 | 606   | 102   | 5    | 7.9  | 619   | 123  | 6    | 9.0  | 0.968            |
| Lu S                 | 2012 | 402   | 86    | 3    | 9.4  | 285   | 105  | 9    | 15.4 | 0.854            |
| Wang J               | 2012 | 132   | 128   | 40   | 34.7 | 30    | 53   | 17   | 43.5 | 0.434            |
| Lin YD               | 2013 | 946   | 226   | 14   | 10.7 | 924   | 249  | 13   | 11.6 | 0.405            |
| Riobello C           | 2016 | 39    | 94    | 47   | 52.2 | 114   | 262  | 125  | 51.1 | 0.299            |
| Li YH (Uighur)       | 2018 | 160   | 107   | 17   | 24.8 | 24    | 53   | 22   | 49.0 | 0.479            |
| Li YH (Chinese Han)  | 2018 | 228   | 64    | 4    | 12.2 | 161   | 47   | 0    | 11.3 | 0.066            |
| <b>rs2283228</b>     |      |       |       |      |      |       |      |      |      |                  |
| Unoki H (Japanese)   | 2008 | 1,379 | 1,592 | 449  | 36.4 | 426   | 590  | 217  | 41.5 | 0.606            |
| Unoki H (Chinese)    | 2008 | 612   | 667   | 194  | 35.8 | 692   | 812  | 243  | 37.1 | 0.846            |
| Unoki H (Caucasian)  | 2008 | 3,413 | 469   | 15   | 6.4  | 4,154 | 706  | 29   | 7.8  | 0.866            |
| Chen Z               | 2010 | 21    | 29    | 7    | 37.7 | 135   | 162  | 44   | 36.7 | 0.671            |
| Wei Q                | 2010 | 87    | 40    | 6    | 19.5 | 33    | 61   | 12   | 40.1 | <b>0.042</b>     |
| Saif-Ali R (Chinese) | 2011 | 168   | 105   | 27   | 26.5 | 99    | 98   | 33   | 35.7 | 0.279            |
| Saif-Ali R (Malay)   | 2011 | 141   | 72    | 21   | 24.4 | 73    | 83   | 21   | 35.3 | 0.725            |
| Turki A              | 2013 | 812   | 77    | 2    | 4.5  | 519   | 53   | 3    | 5.1  | 0.203            |
| Wang H               | 2013 | 1200  | 1093  | 240  | 31.1 | 1061  | 1246 | 336  | 36.3 | 0.314            |
| Khan IA              | 2015 | 205   | 41    | 4    | 9.8  | 231   | 17   | 2    | 4.2  | <b>0.014</b>     |
| <b>rs151290</b>      |      |       |       |      |      |       |      |      |      |                  |
| Yasuda K             | 2008 | 543   | 656   | 215  | 26.8 | 421   | 691  | 299  | 45.7 | 0.621            |
| Wei Q                | 2010 | 43    | 64    | 26   | 43.6 | 17    | 60   | 29   | 55.7 | 0.131            |
| Shi L                | 2011 | 87    | 61    | 23   | 31.3 | 108   | 144  | 36   | 37.5 | 0.258            |
| Van JV               | 2011 | 2081  | 1220  | 153  | 22.1 | 2045  | 1258 | 204  | 23.8 | 0.567            |
| Gao X                | 2012 | 47    | 107   | 46   | 49.8 | 41    | 109  | 50   | 52.3 | 0.192            |
| Turki A              | 2012 | 465   | 343   | 71   | 27.6 | 312   | 209  | 34   | 25.0 | 0.899            |
| Gao K                | 2016 | 294   | 358   | 71   | 34.6 | 287   | 364  | 107  | 38.1 | 0.624            |
| Al-Shammari MS       | 2017 | 177   | 121   | 32   | 28.0 | 290   | 177  | 49   | 26.6 | <b>0.005</b>     |
| Huang Q              | 2018 | 197   | 247   | 60   | 36.4 | 181   | 234  | 80   | 39.8 | 0.764            |
| <b>rs2074196</b>     |      |       |       |      |      |       |      |      |      |                  |
| Yasuda K (Japanese)  | 2008 | 1674  | 2022  | 635  | 38.0 | 1335  | 2130 | 902  | 45.0 | 0.328            |

|                      |      |      |     |     |      |      |     |     |      |       |
|----------------------|------|------|-----|-----|------|------|-----|-----|------|-------|
| Yasuda K (Chinese)   | 2008 | 707  | 588 | 120 | 29.3 | 621  | 753 | 201 | 36.7 | 0.243 |
| Yasuda K (Korean)    | 2008 | 316  | 363 | 76  | 34.1 | 212  | 309 | 109 | 41.8 | 0.843 |
| Yasuda K (Caucasian) | 2008 | 2542 | 225 | 4   | 4.2  | 3052 | 331 | 8   | 5.1  | 0.756 |
| Hu C                 | 2009 | 796  | 776 | 175 | 32.2 | 688  | 808 | 213 | 36.1 | 0.306 |

<sup>a</sup> MAF: minor allele frequency

WW, WM, and MM refers to CC, CT, and TT for **rs2237892**; WW, WM, and MM refers to AA, AC, and CC for **rs2237895**; WW, WM, and MM refers to CC, CT, and TT for **rs2237897**; WW, WM, and MM refers to GG, GA, and AA for **rs231362**; WW, WM, and MM refers to AA, AC, and CC for **rs2283228**; WW, WM, and MM refers to CC, CA, and AA for **rs151290**; WW, WM, and MM refers to GG, GT, and TT for **rs151290**



**supplemental Table 3** Stratified analysis of *KCNQ1* gene seven polymorphisms on T2DM

| Variables      | N <sup>a</sup> | Cases/<br>Controls | Allelic comparison   |                |                    |                | Homozygote comparison |                |                    |                | Heterozygote comparison |                |                    |                | Dominant genetic model |                |                    |                | Recessive genetic model |                |                    |                |
|----------------|----------------|--------------------|----------------------|----------------|--------------------|----------------|-----------------------|----------------|--------------------|----------------|-------------------------|----------------|--------------------|----------------|------------------------|----------------|--------------------|----------------|-------------------------|----------------|--------------------|----------------|
|                |                |                    | OR<br>(95%CI)        | P <sup>b</sup> | I <sup>2</sup> (%) | P <sup>c</sup> | OR<br>(95%CI)         | P <sup>b</sup> | I <sup>2</sup> (%) | P <sup>c</sup> | OR<br>(95%CI)           | P <sup>b</sup> | I <sup>2</sup> (%) | P <sup>c</sup> | OR<br>(95%CI)          | P <sup>b</sup> | I <sup>2</sup> (%) | P <sup>c</sup> | OR<br>(95%CI)           | P <sup>b</sup> | I <sup>2</sup> (%) | P <sup>c</sup> |
| rs2237892      |                |                    |                      |                |                    |                |                       |                |                    |                |                         |                |                    |                |                        |                |                    |                |                         |                |                    |                |
| Ethnicity      |                |                    |                      |                |                    |                |                       |                |                    |                |                         |                |                    |                |                        |                |                    |                |                         |                |                    |                |
| Asian          | 32             | 32636/2<br>8291    | 1.35 (1.28,<br>1.41) | <0.001         | 60.2               | <0.001         | 1.91 (1.74,<br>2.10)  | <0.001         | 45.7               | 0.003          | 1.45 (1.34,<br>1.57)    | <0.001         | 29.8               | 0.059          | 1.67 (1.54,<br>1.81)   | <0.001         | 36.0               | 0.024          | 1.39 (1.30,<br>1.48)    | <0.001         | 60.2               | <0.001         |
| Caucasian      | 9              | 11242/1<br>3024    | 0.89 (0.59,<br>1.35) | 0.583          | 95.3               | <0.001         | 0.75 (0.35,<br>1.62)  | 0.459          | 74.5               | 0.001          | 0.77 (0.52,<br>1.14)    | 0.185          | 15.8               | 0.309          | 0.75 (0.40,<br>1.43)   | 0.387          | 63.0               | 0.013          | 0.86 (0.56,<br>1.34)    | 0.513          | 95.0               | <0.001         |
| Mixed          | 1              | 6869/87<br>08      | 1.10 (1.00,<br>1.21) | 0.054          | -                  | -              | 1.63 (0.96,<br>2.79)  | 0.073          | -                  | -              | 1.52 (0.88,<br>2.62)    | 0.132          | -                  | -              | 1.62 (0.95,<br>2.77)   | 0.077          | -                  | -              | 1.09 (0.99,<br>1.21)    | 0.097          | -                  | -              |
| HWE            |                |                    |                      |                |                    |                |                       |                |                    |                |                         |                |                    |                |                        |                |                    |                |                         |                |                    |                |
| Yes            | 34             | 35125/3<br>2338    | 1.32 (1.25,<br>1.38) | <0.001         | 59.5               | <0.001         | 1.85 (1.66,<br>2.07)  | <0.001         | 50.5               | 0.001          | 1.42 (1.29,<br>1.57)    | <0.001         | 37.8               | 0.017          | 1.64 (1.49,<br>1.80)   | <0.001         | 41.6               | 0.008          | 1.35 (1.26,<br>1.44)    | <0.001         | 61.7               | <0.001         |
| No             | 8              | 15622/1<br>7685    | 0.99 (0.70,<br>1.42) | 0.973          | 97.3               | <0.001         | 1.15 (0.55,<br>2.38)  | 0.716          | 94.7               | <0.001         | 1.27 (0.93,<br>1.74)    | 0.139          | 64.6               | 0.006          | 1.15 (0.64,<br>2.06)   | 0.651          | 91.7               | <0.001         | 0.97 (0.66,<br>1.43)    | 0.876          | 96.8               | <0.001         |
| Control source |                |                    |                      |                |                    |                |                       |                |                    |                |                         |                |                    |                |                        |                |                    |                |                         |                |                    |                |
| Population     | 18             | 40416/4<br>0381    | 1.30 (1.22,<br>1.37) | <0.001         | 71.2               | <0.001         | 1.82 (1.6,<br>2.07)   | <0.001         | 60.3               | 0.001          | 1.40 (1.24,<br>1.58)    | <0.001         | 56.2               | 0.002          | 1.61 (1.43,<br>1.82)   | <0.001         | 57.1               | 0.002          | 1.33 (1.24,<br>1.43)    | <0.001         | 71.3               | <0.001         |
| Hospital       | 24             | 10331/9<br>642     | 1.16 (0.97,<br>1.38) | 0.111          | 92.2               | <0.001         | 1.57 (1.15,<br>2.13)  | 0.004          | 85.5               | <0.001         | 1.42 (1.22,<br>1.64)    | <0.001         | 34.2               | 0.056          | 1.5 (1.18,<br>1.9)     | 0.001          | 77.9               | <0.001         | 1.13 (0.91,<br>1.42)    | 0.269          | 91.3               | <0.001         |
| Score          |                |                    |                      |                |                    |                |                       |                |                    |                |                         |                |                    |                |                        |                |                    |                |                         |                |                    |                |
| <9             | 25             | 16490/1<br>7700    | 1.13 (0.95,<br>1.34) | 0.178          | 92.3               | <0.001         | 1.57 (1.13,<br>2.16)  | 0.006          | 85.7               | <0.001         | 1.50 (1.26,<br>1.77)    | <0.001         | 44.3               | 0.011          | 1.52 (1.18,<br>1.97)   | 0.001          | 78.9               | <0.001         | 1.10 (0.90,<br>1.34)    | 0.375          | 91.3               | <0.001         |
| ≥9             | 17             | 34257/3<br>2323    | 1.32 (1.26,<br>1.38) | <0.001         | 53.3               | 0.005          | 1.77 (1.58,<br>2.00)  | <0.001         | 55.9               | 0.003          | 1.35 (1.21,<br>1.50)    | <0.001         | 45.8               | 0.024          | 1.56 (1.40,<br>1.73)   | <0.001         | 49.1               | 0.014          | 1.37 (1.30,<br>1.45)    | <0.001         | 47.6               | 0.015          |
| Year           |                |                    |                      |                |                    |                |                       |                |                    |                |                         |                |                    |                |                        |                |                    |                |                         |                |                    |                |
| <2015          | 27             | 39678/3<br>7037    | 1.30 (1.18,<br>1.43) | <0.001         | 91.6               | <0.001         | 1.74 (1.45,<br>2.10)  | <0.001         | 86.1               | <0.001         | 1.38 (1.23,<br>1.55)    | <0.001         | 61.4               | <0.001         | 1.56 (1.34,<br>1.81)   | <0.001         | 80.6               | <0.001         | 1.33 (1.18,<br>1.49)    | <0.001         | 90.6               | <0.001         |

|                        |    |                 |                      |        |      |        |                      |        |      |        |                      |        |      |        |                      |        |      |        |                      |        |      |        |
|------------------------|----|-----------------|----------------------|--------|------|--------|----------------------|--------|------|--------|----------------------|--------|------|--------|----------------------|--------|------|--------|----------------------|--------|------|--------|
| ≥2015                  | 15 | 11069/1<br>2986 | 1.11 (0.98,<br>1.25) | 0.103  | 64.5 | <0.001 | 1.65 (1.35,<br>2.02) | <0.001 | 20.8 | 0.227  | 1.53 (1.29,<br>1.81) | <0.001 | 0.0  | 0.993  | 1.61 (1.37,<br>1.89) | <0.001 | 0.0  | 0.720  | 1.07 (0.92,<br>1.24) | 0.368  | 62.5 | 0.001  |
| Number of participants |    |                 |                      |        |      |        |                      |        |      |        |                      |        |      |        |                      |        |      |        |                      |        |      |        |
| ≤500                   | 12 | 1723/17<br>09   | 1.02 (0.81,<br>1.28) | 0.875  | 69.7 | <0.001 | 1.45 (0.96,<br>2.19) | 0.076  | 51.6 | 0.024  | 1.63 (1.25,<br>2.13) | <0.001 | 0.0  | 0.459  | 1.54 (1.11,<br>2.13) | 0.010  | 34.5 | 0.123  | 0.93 (0.70,<br>1.23) | 0.618  | 66.4 | 0.001  |
| >500                   | 30 | 49024/4<br>8314 | 1.27 (1.17,<br>1.39) | <0.001 | 91.0 | <0.001 | 1.73 (1.47,<br>2.04) | <0.001 | 84.1 | <0.001 | 1.38 (1.25,<br>1.53) | <0.001 | 52.3 | 0.001  | 1.55 (1.36,<br>1.78) | <0.001 | 77.3 | <0.001 | 1.31 (1.18,<br>1.45) | <0.001 | 90.1 | <0.001 |
| Influential analysis   |    |                 |                      |        |      |        |                      |        |      |        |                      |        |      |        |                      |        |      |        |                      |        |      |        |
| Maximal                | 41 | -/-             | 1.22 (1.13,<br>1.32) | <0.001 | 88.9 | <0.001 | 1.66 (1.42,<br>1.94) | <0.001 | 80.2 | <0.001 | 1.37 (1.26,<br>1.50) | <0.001 | 37.8 | 0.010  | 1.52 (1.35,<br>1.73) | <0.001 | 71.1 | <0.001 | 1.22 (1.11,<br>1.34) | <0.001 | 87.8 | <0.001 |
| Minimal                | 41 | -/-             | 1.30 (1.24,<br>1.37) | <0.001 | 67.6 | <0.001 | 1.86 (1.68,<br>2.05) | <0.001 | 47.9 | 0.001  | 1.43 (1.31,<br>1.57) | <0.001 | 36.9 | 0.002  | 1.64 (1.51,<br>1.79) | <0.001 | 37.7 | 0.010  | 1.32 (1.24,<br>1.41) | <0.001 | 69.2 | <0.001 |
| rs2237895              |    |                 |                      |        |      |        |                      |        |      |        |                      |        |      |        |                      |        |      |        |                      |        |      |        |
| Ethnicity              |    |                 |                      |        |      |        |                      |        |      |        |                      |        |      |        |                      |        |      |        |                      |        |      |        |
| Asian                  | 16 | 30077/2<br>4361 | 1.27 (1.22,<br>1.33) | <0.001 | 53.1 | 0.006  | 1.61 (1.48,<br>1.76) | <0.001 | 43.0 | 0.035  | 1.29 (1.24,<br>1.34) | <0.001 | 0.0  | 0.529  | 1.35 (1.28,<br>1.42) | <0.001 | 36.2 | 0.074  | 1.42 (1.33,<br>1.52) | <0.001 | 21.7 | 0.207  |
| Caucasian              | 7  | 12050/1<br>3915 | 1.10 (1.02,<br>1.19) | 0.016  | 72.6 | 0.001  | 0.75 (0.35,<br>1.62) | 0.029  | 73.2 | 0.001  | 1.12 (1.03,<br>1.23) | 0.009  | 47.0 | 0.079  | 1.15 (1.03,<br>1.27) | 0.010  | 65.1 | 0.009  | 1.14 (1.01,<br>1.30) | 0.033  | 61.7 | 0.016  |
| HWE                    |    |                 |                      |        |      |        |                      |        |      |        |                      |        |      |        |                      |        |      |        |                      |        |      |        |
| Yes                    | 21 | 41697/3<br>7663 | 1.21 (1.16,<br>1.27) | <0.001 | 73.3 | <0.001 | 1.45 (1.32,<br>1.60) | <0.001 | 70.4 | <0.001 | 1.23 (1.17,<br>1.29) | <0.001 | 51.3 | 0.004  | 1.28 (1.21,<br>1.35) | <0.001 | 66.3 | <0.001 | 1.31 (1.22,<br>1.41) | <0.001 | 55.5 | 0.001  |
| No                     | 2  | 430/613         | 1.47 (0.72,<br>2.97) | 0.288  | 89.9 | 0.002  | 1.8 (0.58,<br>5.58)  | 0.306  | 86.5 | 0.006  | 1.29 (0.83,<br>2.01) | 0.257  | 40.1 | 0.196  | 1.54 (0.72,<br>3.29) | 0.261  | 80.8 | 0.022  | 1.51 (0.62,<br>3.64) | 0.364  | 83.0 | 0.015  |
| Control source         |    |                 |                      |        |      |        |                      |        |      |        |                      |        |      |        |                      |        |      |        |                      |        |      |        |
| Population             | 13 | 30497/2<br>7847 | 1.22 (1.15,<br>1.30) | <0.001 | 78.3 | <0.001 | 1.48 (1.32,<br>1.67) | <0.001 | 74.6 | <0.001 | 1.24 (1.16,<br>1.33) | <0.001 | 66.5 | <0.001 | 1.29 (1.19,<br>1.39) | <0.001 | 74.9 | <0.001 | 1.34 (1.23,<br>1.46) | <0.001 | 58.1 | 0.004  |
| Hospital               | 10 | 11630/1<br>0429 | 1.20 (1.10,<br>1.31) | <0.001 | 68.9 | 0.001  | 1.40 (1.17,<br>1.67) | <0.001 | 67.1 | 0.001  | 1.22 (1.15,<br>1.30) | <0.001 | 0.0  | 0.657  | 1.26 (1.15,<br>1.38) | <0.001 | 45.4 | 0.058  | 1.26 (1.09,<br>1.46) | 0.002  | 58.4 | 0.010  |
| Score                  |    |                 |                      |        |      |        |                      |        |      |        |                      |        |      |        |                      |        |      |        |                      |        |      |        |

|                        |    |             |                   |        |      |        |                   |        |      |        |                   |        |      |        |                   |        |      |        |                   |        |      |        |
|------------------------|----|-------------|-------------------|--------|------|--------|-------------------|--------|------|--------|-------------------|--------|------|--------|-------------------|--------|------|--------|-------------------|--------|------|--------|
| <9                     | 11 | 8568/8828   | 1.18 (1.09, 1.27) | <0.001 | 58.2 | 0.008  | 1.35 (1.15, 1.58) | <0.001 | 54.1 | 0.016  | 1.20 (1.12, 1.28) | <0.001 | 0.0  | 0.783  | 1.23 (1.14, 1.33) | <0.001 | 28.6 | 0.073  | 1.22 (1.07, 1.38) | 0.002  | 42.1 | 0.069  |
| ≥9                     | 12 | 33559/29448 | 1.24 (1.17, 1.31) | <0.001 | 79.9 | <0.001 | 1.53 (1.36, 1.72) | <0.001 | 76.5 | <0.001 | 1.25 (1.16, 1.34) | <0.001 | 68.9 | <0.001 | 1.31 (1.21, 1.41) | <0.001 | 76.8 | <0.001 | 1.37 (1.26, 1.49) | <0.001 | 60.5 | 0.003  |
| Year                   |    |             |                   |        |      |        |                   |        |      |        |                   |        |      |        |                   |        |      |        |                   |        |      |        |
| <2015                  | 20 | 41517/37159 | 1.24 (1.19, 1.29) | <0.001 | 70.8 | <0.001 | 1.52 (1.39, 1.66) | <0.001 | 66.1 | <0.001 | 1.24 (1.19, 1.30) | <0.001 | 47.7 | 0.010  | 1.30 (1.23, 1.38) | <0.001 | 63.3 | <0.001 | 1.35 (1.26, 1.44) | <0.001 | 48.9 | 0.007  |
| ≥2015                  | 3  | 610/1117    | 0.89 (0.72, 1.10) | 0.279  | 45.4 | 0.160  | 0.77 (0.50, 1.19) | 0.238  | 43.7 | 0.169  | 0.97 (0.78, 1.21) | 0.774  | 0.0  | 0.411  | 0.91 (0.69, 1.18) | 0.460  | 31.5 | 0.232  | 0.83 (0.62, 1.11) | 0.201  | 6.3  | 0.344  |
| Number of participants |    |             |                   |        |      |        |                   |        |      |        |                   |        |      |        |                   |        |      |        |                   |        |      |        |
| ≤500                   | 4  | 491/715     | 1.28 (0.86, 1.93) | 0.229  | 77.8 | 0.004  | 1.54 (0.70, 3.4)  | 0.281  | 72.0 | 0.013  | 1.23 (0.90, 1.67) | 0.188  | 18.2 | 0.300  | 1.33 (0.86, 2.06) | 0.208  | 63.5 | 0.042  | 1.4 (0.75, 2.62)  | 0.288  | 61.7 | 0.050  |
| >500                   | 19 | 41636/37561 | 1.21 (1.16, 1.27) | <0.001 | 74.7 | <0.001 | 1.45 (1.32, 1.59) | <0.001 | 72.0 | <0.001 | 1.23 (1.17, 1.29) | <0.001 | 54.0 | 0.003  | 1.28 (1.21, 1.35) | <0.001 | 68.0 | <0.001 | 1.31 (1.22, 1.41) | <0.001 | 58.1 | 0.001  |
| Influential analysis   |    |             |                   |        |      |        |                   |        |      |        |                   |        |      |        |                   |        |      |        |                   |        |      |        |
| Maximal                | 22 | -/-         | 1.20 (1.15, 1.26) | <0.001 | 70.1 | <0.001 | 1.43 (1.30, 1.57) | <0.001 | 65.6 | <0.001 | 1.22 (1.16, 1.28) | <0.001 | 44.4 | 0.014  | 1.27 (1.20, 1.34) | <0.001 | 62.2 | <0.001 | 1.30 (1.20, 1.39) | <0.001 | 48.1 | 0.007  |
| Minimal                | 22 | -/-         | 1.23 (1.17, 1.28) | <0.001 | 66.5 | <0.001 | 1.49 (1.35, 1.63) | <0.001 | 68.0 | <0.001 | 1.26 (1.22, 1.30) | <0.001 | 6.3  | 0.377  | 1.30 (1.24, 1.37) | <0.001 | 48.6 | 0.006  | 1.34 (1.25, 1.43) | <0.001 | 50.8 | <0.001 |
| rs2237897              |    |             |                   |        |      |        |                   |        |      |        |                   |        |      |        |                   |        |      |        |                   |        |      |        |
| HWE                    |    |             |                   |        |      |        |                   |        |      |        |                   |        |      |        |                   |        |      |        |                   |        |      |        |
| Yes                    | 8  | 17014/16377 | 1.24 (1.04, 1.48) | 0.017  | 95.0 | <0.001 | 1.50 (1.02, 2.22) | 0.041  | 94.1 | <0.001 | 1.21 (0.96, 1.53) | 0.111  | 86.0 | <0.001 | 1.36 (0.99, 1.87) | 0.058  | 93.4 | <0.001 | 1.29 (1.07, 1.55) | 0.007  | 90.8 | <0.001 |
| No                     | 4  | 1794/2470   | 1.35 (1.10, 1.65) | 0.003  | 52.6 | 0.097  | 1.58 (1.27, 1.96) | <0.001 | 0.0  | 0.596  | 1.08 (0.48, 2.46) | 0.853  | 81.8 | 0.004  | 1.26 (0.74, 2.14) | 0.388  | 61.3 | 0.075  | 1.66 (1.01, 2.72) | 0.046  | 85.6 | <0.001 |
| Control source         |    |             |                   |        |      |        |                   |        |      |        |                   |        |      |        |                   |        |      |        |                   |        |      |        |
| Population             | 5  | 9280/9824   | 1.29 (1.01, 1.64) | 0.041  | 96.6 | <0.001 | 1.63 (1.00, 2.67) | 0.050  | 95.7 | <0.001 | 1.26 (0.96, 1.65) | 0.092  | 88.7 | <0.001 | 1.45 (0.99, 2.13) | 0.054  | 95.1 | <0.001 | 1.33 (1.02, 1.74) | 0.038  | 93.7 | <0.001 |
| Hospital               | 7  | 9528/9023   | 1.26 (1.09, 1.47) | 0.002  | 77.7 | <0.001 | 1.35 (0.9, 2.03)  | 0.143  | 78.3 | <0.001 | 1.08 (0.72, 1.6)  | 0.724  | 77.6 | <0.001 | 1.21 (0.83, 1.78) | 0.328  | 77.8 | <0.001 | 1.39 (1.13, 1.72) | 0.002  | 82.1 | <0.001 |

|                        |    |                 |                      |                  |      |                  |                      |                  |      |                  |                      |                  |      |                  |                      |                  |      |                  |                      |                  |      |                  |
|------------------------|----|-----------------|----------------------|------------------|------|------------------|----------------------|------------------|------|------------------|----------------------|------------------|------|------------------|----------------------|------------------|------|------------------|----------------------|------------------|------|------------------|
| Score                  |    |                 |                      |                  |      |                  |                      |                  |      |                  |                      |                  |      |                  |                      |                  |      |                  |                      |                  |      |                  |
| <9                     | 6  | 3732/44<br>38   | 1.26 (1.03,<br>1.53) | <b>0.022</b>     | 82.6 | <b>&lt;0.001</b> | 1.29 (0.81,<br>2.03) | 0.281            | 82.9 | <b>&lt;0.001</b> | 1.02 (0.65,<br>1.60) | 0.925            | 82.0 | <b>&lt;0.001</b> | 1.15 (0.75,<br>1.77) | 0.530            | 82.5 | <b>&lt;0.001</b> | 1.43 (1.08,<br>1.89) | <b>0.014</b>     | 85.6 | <b>&lt;0.001</b> |
| ≥9                     | 6  | 15076/1<br>4409 | 1.29 (1.05,<br>1.58) | <b>0.015</b>     | 95.7 | <b>&lt;0.001</b> | 1.68 (1.07,<br>2.64) | <b>0.025</b>     | 94.7 | <b>&lt;0.001</b> | 1.27 (0.98,<br>1.64) | 0.066            | 86.6 | <b>&lt;0.001</b> | 1.48 (1.04,<br>2.12) | <b>0.031</b>     | 94.0 | <b>&lt;0.001</b> | 1.33 (1.07,<br>1.65) | <b>0.011</b>     | 92.0 | <b>&lt;0.001</b> |
| Number of participants |    |                 |                      |                  |      |                  |                      |                  |      |                  |                      |                  |      |                  |                      |                  |      |                  |                      |                  |      |                  |
| ≤500                   | 3  | 361/735         | 1.46 (1.08,<br>1.97) | <b>0.014</b>     | 50.4 | 0.133            | 1.25 (0.72,<br>2.17) | 0.435            | 0.0  | 0.628            | 0.89 (0.22,<br>3.52) | 0.866            | 80.7 | <b>0.023</b>     | 1.03 (0.45,<br>2.33) | 0.951            | 52.0 | 0.149            | 1.91 (0.98,<br>3.72) | 0.059            | 81.4 | <b>0.005</b>     |
| >500                   | 9  | 18447/1<br>8112 | 1.24 (1.06,<br>1.44) | <b>0.007</b>     | 94.3 | <b>&lt;0.001</b> | 1.52 (1.08,<br>2.14) | <b>0.016</b>     | 93.3 | <b>&lt;0.001</b> | 1.25 (1.00,<br>1.55) | <b>0.045</b>     | 85.5 | <b>&lt;0.001</b> | 1.39 (1.04,<br>1.84) | <b>0.025</b>     | 92.8 | <b>&lt;0.001</b> | 1.28 (1.09,<br>1.50) | <b>0.003</b>     | 89.8 | <b>&lt;0.001</b> |
| Influential analysis   |    |                 |                      |                  |      |                  |                      |                  |      |                  |                      |                  |      |                  |                      |                  |      |                  |                      |                  |      |                  |
| Maximal                | 11 | -/-             | 1.24 (1.07,<br>1.42) | <b>0.003</b>     | 92.7 | <b>&lt;0.001</b> | 1.38 (1.00,<br>1.91) | <b>0.049</b>     | 91.9 | <b>&lt;0.001</b> | 1.15 (0.92,<br>1.45) | 0.224            | 84.4 | <b>&lt;0.001</b> | 1.28 (0.97,<br>1.68) | <b>0.083</b>     | 91.7 | <b>&lt;0.001</b> | 1.30 (1.11,<br>1.52) | <b>0.001</b>     | 88.4 | <b>&lt;0.001</b> |
| Minimal                | 11 | -/-             | 1.33 (1.22,<br>1.46) | <b>&lt;0.001</b> | 75.3 | <b>&lt;0.001</b> | 1.71 (1.40,<br>2.08) | <b>&lt;0.001</b> | 72.0 | <b>&lt;0.001</b> | 1.30 (1.09,<br>1.53) | <b>0.003</b>     | 61.6 | <b>0.005</b>     | 1.49 (1.25,<br>1.76) | <b>&lt;0.001</b> | 66.4 | <b>0.002</b>     | 1.44 (1.27,<br>1.63) | <b>&lt;0.001</b> | 78.9 | <b>&lt;0.001</b> |
| <b>rs2283228</b>       |    |                 |                      |                  |      |                  |                      |                  |      |                  |                      |                  |      |                  |                      |                  |      |                  |                      |                  |      |                  |
| Ethnicity              |    |                 |                      |                  |      |                  |                      |                  |      |                  |                      |                  |      |                  |                      |                  |      |                  |                      |                  |      |                  |
| Asian                  | 7  | 8150/64<br>77   | 1.34 (1.16,<br>1.55) | <b>&lt;0.001</b> | 81.3 | <b>&lt;0.001</b> | 1.55 (1.24,<br>1.94) | <b>&lt;0.001</b> | 62.3 | <b>0.014</b>     | 1.19 (1.07,<br>1.33) | <b>0.001</b>     | 0.0  | 0.708            | 1.33 (1.16,<br>1.52) | <b>&lt;0.001</b> | 26.9 | 0.223            | 1.48 (1.21,<br>1.81) | <b>&lt;0.001</b> | 82.6 | <b>&lt;0.001</b> |
| Caucasian              | 2  | 4788/54<br>64   | 1.23 (1.10,<br>1.37) | <b>&lt;0.001</b> | 0.0  | 0.638            | 1.66 (0.92,<br>2.99) | 0.093            | 0.0  | 0.687            | 1.36 (0.75,<br>2.48) | 0.315            | 0.0  | 0.591            | 1.62 (0.90,<br>2.91) | 0.111            | 0.0  | 0.671            | 1.23 (1.10,<br>1.39) | <b>&lt;0.001</b> | 0.0  | 0.544            |
| Mixed                  | 1  | 250/250         | 0.40 (0.24,<br>0.68) | <b>0.001</b>     | -    | -                | 0.44 (0.08,<br>2.45) | 0.351            | -    | -                | 1.21 (0.20,<br>7.22) | 0.837            | -    | -                | 0.50 (0.09,<br>2.73) | 0.421            | -    | -                | 0.38 (0.21,<br>0.66) | <b>0.001</b>     | -    | -                |
| Score                  |    |                 |                      |                  |      |                  |                      |                  |      |                  |                      |                  |      |                  |                      |                  |      |                  |                      |                  |      |                  |
| <9                     | 3  | 9850/87<br>65   | 1.22 (0.90,<br>1.65) | 0.199            | 87.2 | <b>&lt;0.001</b> | 1.60 (1.02,<br>2.50) | <b>0.039</b>     | 60.1 | <b>0.020</b>     | 1.06 (0.88,<br>1.28) | 0.516            | 0.0  | 0.944            | 1.25 (0.98,<br>1.60) | 0.078            | 14.9 | 0.316            | 1.31 (0.88,<br>1.95) | 0.190            | 88.4 | <b>&lt;0.001</b> |
| ≥9                     | 7  | 3338/34<br>26   | 1.25 (1.18,<br>1.32) | <b>&lt;0.001</b> | 0.0  | 0.940            | 1.58(1.38,<br>1.80)  | <b>&lt;0.001</b> | 0.0  | 0.996            | 1.27 (1.11,<br>1.44) | <b>&lt;0.001</b> | 0.0  | 0.904            | 1.41 (1.25,<br>1.59) | <b>&lt;0.001</b> | 0.0  | 0.950            | 1.29 (1.21,<br>1.39) | <b>&lt;0.001</b> | 0.0  | 0.675            |
| Number of participants |    |                 |                      |                  |      |                  |                      |                  |      |                  |                      |                  |      |                  |                      |                  |      |                  |                      |                  |      |                  |

|                        |   |            |                   |        |      |        |                    |        |      |        |                   |       |      |       |                   |        |      |       |                   |        |      |        |
|------------------------|---|------------|-------------------|--------|------|--------|--------------------|--------|------|--------|-------------------|-------|------|-------|-------------------|--------|------|-------|-------------------|--------|------|--------|
| ≤500                   | 4 | 674/874    | 1.18 (0.58, 2.38) | 0.645  | 91.8 | <0.001 | 1.64 (0.71, 3.80)  | 0.245  | 63.7 | 0.041  | 1.03 (0.65, 1.64) | 0.895 | 0.0  | 0.916 | 1.35 (0.83, 2.20) | 0.224  | 12.6 | 0.330 | 1.33 (0.50, 3.52) | 0.568  | 93.0 | <0.001 |
| >500                   | 6 | 12514/1317 | 1.22 (1.13, 1.32) | <0.001 | 56.0 | 0.045  | 1.47 (1.24, 1.76)  | <0.001 | 45.7 | 0.101  | 1.20 (1.08, 1.34) | 0.001 | 0.0  | 0.650 | 1.33 (1.16, 1.51) | <0.001 | 24.9 | 0.247 | 1.26 (1.15, 1.37) | <0.001 | 43.8 | 0.113  |
| Influential analysis   |   |            |                   |        |      |        |                    |        |      |        |                   |       |      |       |                   |        |      |       |                   |        |      |        |
| Maximal                | 9 | -/-        | 1.19 (1.06, 1.34) | 0.003  | 76.5 | <0.001 | 1.46 (1.24, 1.73)  | <0.001 | 35.9 | 0.131  | 1.20 (1.07, 1.33) | 0.001 | 0.0  | 0.873 | 1.31 (1.18, 1.46) | <0.001 | 2.2  | 0.416 | 1.22 (1.05, 1.42) | 0.008  | 77.0 | <0.001 |
| Minimal                | 9 | -/-        | 1.30 (1.16, 1.45) | <0.001 | 75.3 | <0.001 | 1.55 (1.27, 1.89)  | <0.001 | 50.6 | 0.039  | 1.20 (1.08, 1.34) | 0.001 | 0.0  | 0.909 | 1.33 (1.18, 1.49) | <0.001 | 10.9 | 0.342 | 1.38 (1.19, 1.61) | <0.001 | 77.5 | <0.001 |
| rs231362               |   |            |                   |        |      |        |                    |        |      |        |                   |       |      |       |                   |        |      |       |                   |        |      |        |
| Ethnicity              |   |            |                   |        |      |        |                    |        |      |        |                   |       |      |       |                   |        |      |       |                   |        |      |        |
| Asian                  | 7 | 6058/4532  | 1.19 (0.73, 1.94) | 0.492  | 95.9 | <0.001 | 1.63 (0.71, 3.74)  | 0.250  | 80.0 | <0.001 | 1.35 (0.88, 2.09) | 0.174 | 32.2 | 0.182 | 1.42 (0.75, 2.70) | 0.280  | 68.9 | 0.004 | 1.28 (0.74, 2.21) | 0.386  | 95.7 | <0.001 |
| Caucasian              | 2 | 1608/2094  | 1.09 (0.89, 1.35) | 0.393  | 60.2 | 0.113  | 1.19 (0.78, 1.82)  | 0.424  | 56.2 | 0.131  | 1.11 (0.87, 1.42) | 0.389 | 0.0  | 0.356 | 1.15 (0.82, 1.62) | 0.422  | 50.4 | 0.156 | 1.15 (0.95, 1.39) | 0.155  | 20.4 | 0.262  |
| Control source         |   |            |                   |        |      |        |                    |        |      |        |                   |       |      |       |                   |        |      |       |                   |        |      |        |
| Population             | 5 | 3374/3587  | 1.26 (0.95, 1.67) | 0.113  | 87.7 | <0.001 | 1.53 (0.71, 3.29)  | 0.282  | 85.6 | <0.001 | 1.18 (0.80, 1.74) | 0.408 | 52.5 | 0.077 | 1.36 (0.78, 2.39) | 0.279  | 78.0 | 0.001 | 1.31 (0.96, 1.79) | 0.087  | 83.3 | <0.001 |
| Hospital               | 4 | 4292/3039  | 1.04 (0.49, 2.19) | 0.923  | 96.9 | <0.001 | 1.44 (0.68, 3.05)  | 0.338  | 58.2 | 0.066  | 1.30 (0.83, 2.04) | 0.249 | 0.0  | 0.574 | 1.26 (0.71, 2.25) | 0.436  | 36.0 | 0.196 | 1.08 (0.46, 2.55) | 0.858  | 97.0 | <0.001 |
| Score                  |   |            |                   |        |      |        |                    |        |      |        |                   |       |      |       |                   |        |      |       |                   |        |      |        |
| <9                     | 3 | 1075/598   | 1.94 (1.32, 2.87) | 0.563  | 77.7 | 0.011  | 4.03 (1.41, 11.51) | 0.009  | 76.4 | 0.014  | 1.74 (0.88, 3.45) | 0.111 | 49.7 | 0.137 | 2.68 (1.10, 6.52) | 0.517  | 72.1 | 0.028 | 2.31 (1.43, 3.73) | 0.001  | 72.5 | 0.026  |
| ≥9                     | 6 | 6591/6028  | 0.90 (0.63, 1.29) | 0.001  | 94.7 | <0.001 | 1.04 (0.76, 1.44)  | 0.798  | 28.1 | 0.224  | 1.11 (0.89, 1.38) | 0.377 | 0.0  | 0.526 | 1.08 (0.85, 1.37) | 0.030  | 8.5  | 0.362 | 0.90 (0.59, 1.38) | 0.624  | 94.9 | <0.001 |
| Number of participants |   |            |                   |        |      |        |                    |        |      |        |                   |       |      |       |                   |        |      |       |                   |        |      |        |
| ≤500                   | 2 | 584/199    | 2.05 (1.04, 4.06) | 0.039  | 88.1 | 0.004  | 3.98 (0.89, 17.81) | 0.071  | 88.2 | 0.004  | 1.62 (0.65, 4.04) | 0.303 | 72.2 | 0.058 | 2.42 (0.74, 7.97) | 0.145  | 85.1 | 0.010 | 2.71 (1.25, 5.86) | 0.012  | 79.0 | 0.029  |
| >500                   | 7 | 7082/6427  | 0.99 (0.70, 1.39) | 0.941  | 94.6 | <0.001 | 1.10 (0.75, 1.61)  | 0.617  | 43.5 | 0.101  | 1.13 (0.91, 1.40) | 0.277 | 0.0  | 0.481 | 1.10 (0.80, 1.49) | 0.565  | 31.1 | 0.191 | 0.99 (0.66, 1.48) | 0.967  | 94.7 | <0.001 |

|                        |   |           |                   |                  |      |                  |                   |                  |      |                  |                   |                  |      |       |                   |                  |      |              |                   |              |      |                  |
|------------------------|---|-----------|-------------------|------------------|------|------------------|-------------------|------------------|------|------------------|-------------------|------------------|------|-------|-------------------|------------------|------|--------------|-------------------|--------------|------|------------------|
| Influential analysis   |   |           |                   |                  |      |                  |                   |                  |      |                  |                   |                  |      |       |                   |                  |      |              |                   |              |      |                  |
| Maximal                | 8 | -/-       | 1.03 (0.75, 1.42) | 0.839            | 94.0 | <b>&lt;0.001</b> | 1.19 (0.85, 1.68) | 0.318            | 42.0 | <b>0.098</b>     | 1.12 (0.91, 1.37) | 0.291            | 0.0  | 0.590 | 1.13 (0.88, 1.46) | 0.341            | 21.5 | 0.258        | 1.06 (0.73, 1.55) | 0.755        | 94.2 | <b>&lt;0.001</b> |
| Minimal                | 8 | -/-       | 1.32 (1.07, 1.61) | <b>0.008</b>     | 82.7 | <b>&lt;0.001</b> | 1.70 (0.98, 2.93) | 0.058            | 77.2 | <b>&lt;0.001</b> | 1.31 (0.96, 1.77) | 0.088            | 23.0 | 0.246 | 1.44 (0.96, 2.18) | 0.081            | 66.1 | <b>0.004</b> | 1.39 (1.11, 1.74) | <b>0.005</b> | 78.2 | <b>&lt;0.001</b> |
| <b>rs151290</b>        |   |           |                   |                  |      |                  |                   |                  |      |                  |                   |                  |      |       |                   |                  |      |              |                   |              |      |                  |
| Ethnicity              |   |           |                   |                  |      |                  |                   |                  |      |                  |                   |                  |      |       |                   |                  |      |              |                   |              |      |                  |
| Asian                  | 6 | 3145/3258 | 1.26 (1.15, 1.37) | <b>&lt;0.001</b> | 20.9 | 0.276            | 1.64 (1.41, 1.90) | <b>&lt;0.001</b> | 0.0  | 0.458            | 1.26 (1.06, 1.50) | <b>0.009</b>     | 19.9 | 0.283 | 1.42 (1.24, 1.62) | <b>&lt;0.001</b> | 0.0  | 0.566        | 1.35 (1.13, 1.62) | <b>0.001</b> | 57.0 | <b>0.040</b>     |
| Caucasian              | 3 | 4663/4578 | 0.98 (0.83, 1.15) | 0.811            | 70.6 | <b>0.033</b>     | 1.00 (0.66, 1.52) | 0.994            | 73.6 | <b>0.023</b>     | 1.07 (0.79, 1.46) | 0.662            | 50.2 | 0.134 | 1.03 (0.71, 1.49) | 0.894            | 68.6 | <b>0.041</b> | 0.98 (0.84, 1.15) | 0.806        | 52.5 | 0.122            |
| Control source         |   |           |                   |                  |      |                  |                   |                  |      |                  |                   |                  |      |       |                   |                  |      |              |                   |              |      |                  |
| Population             | 4 | 6095/6171 | 1.19 (1.07, 1.32) | <b>0.001</b>     | 67.8 | <b>0.025</b>     | 1.55 (1.34, 1.78) | <b>&lt;0.001</b> | 8.6  | 0.350            | 1.34 (1.18, 1.53) | <b>&lt;0.001</b> | 0.0  | 0.912 | 1.44 (1.27, 1.62) | <b>&lt;0.001</b> | 0.0  | 0.861        | 1.19 (1.02, 1.40) | <b>0.031</b> | 72.0 | <b>0.013</b>     |
| Hospital               | 5 | 1713/1665 | 1.10 (0.90, 1.36) | 0.356            | 70.4 | <b>0.009</b>     | 1.16 (0.78, 1.72) | 0.475            | 61.1 | <b>0.036</b>     | 0.92 (0.73, 1.17) | 0.506            | 0.0  | 0.581 | 0.99 (0.79, 1.24) | 0.909            | 5.0  | 0.378        | 1.24 (0.88, 1.73) | 0.216        | 77.7 | <b>0.001</b>     |
| Score                  |   |           |                   |                  |      |                  |                   |                  |      |                  |                   |                  |      |       |                   |                  |      |              |                   |              |      |                  |
| <9                     | 5 | 1713/1665 | 1.10 (0.90, 1.36) | 0.356            | 70.4 | <b>0.009</b>     | 1.16 (0.78, 1.72) | 0.475            | 61.1 | <b>0.036</b>     | 0.92 (0.73, 1.17) | 0.506            | 0.0  | 0.581 | 0.99 (0.79, 1.24) | 0.909            | 5.0  | 0.378        | 1.24 (0.88, 1.73) | 0.216        | 77.7 | <b>0.001</b>     |
| ≥9                     | 4 | 6095/6171 | 1.19 (1.07, 1.32) | <b>0.001</b>     | 67.8 | <b>0.025</b>     | 1.55 (1.34, 1.78) | <b>&lt;0.001</b> | 8.6  | 0.350            | 1.34 (1.18, 1.53) | <b>&lt;0.001</b> | 0.0  | 0.912 | 1.44 (1.27, 1.62) | <b>&lt;0.001</b> | 0.0  | 0.861        | 1.19 (1.02, 1.40) | <b>0.031</b> | 72.0 | <b>0.013</b>     |
| Year                   |   |           |                   |                  |      |                  |                   |                  |      |                  |                   |                  |      |       |                   |                  |      |              |                   |              |      |                  |
| <2015                  | 6 | 6251/6067 | 1.17 (1.01, 1.37) | <b>0.038</b>     | 79.4 | <b>&lt;0.001</b> | 1.36 (1.01, 1.84) | <b>0.042</b>     | 71.7 | <b>0.003</b>     | 1.11 (0.91, 1.36) | 0.288            | 42.4 | 0.122 | 1.20 (0.97, 1.49) | 0.092            | 54.9 | <b>0.050</b> | 1.28 (1.03, 1.61) | <b>0.028</b> | 81.5 | <b>&lt;0.001</b> |
| ≥2015                  | 3 | 1557/1769 | 1.10 (0.97, 1.25) | 0.150            | 33.8 | <b>0.221</b>     | 1.33 (1.01, 1.76) | <b>0.045</b>     | 32.2 | 0.229            | 1.36 (1.09, 1.70) | <b>0.007</b>     | 0.0  | 0.514 | 1.34 (1.06, 1.70) | <b>0.014</b>     | 16.2 | 0.303        | 1.06 (0.92, 1.22) | 0.413        | 0.0  | 0.415            |
| Number of participants |   |           |                   |                  |      |                  |                   |                  |      |                  |                   |                  |      |       |                   |                  |      |              |                   |              |      |                  |
| ≤500                   | 3 | 504/594   | 1.30 (1.06, 1.60) | <b>0.013</b>     | 27.3 | 0.253            | 1.55 (0.96, 2.49) | 0.071            | 39.3 | 0.192            | 0.96 (0.69, 1.33) | 0.790            | 3.4  | 0.355 | 1.15 (0.84, 1.56) | 0.384            | 0.0  | 0.458        | 1.66 (1.15, 2.41) | <b>0.007</b> | 43.2 | 0.172            |

|                      |   |               |                      |        |      |        |                      |        |      |       |                      |        |      |       |                      |        |      |       |                      |        |      |       |
|----------------------|---|---------------|----------------------|--------|------|--------|----------------------|--------|------|-------|----------------------|--------|------|-------|----------------------|--------|------|-------|----------------------|--------|------|-------|
| >500                 | 6 | 7304/72<br>42 | 1.10 (0.97,<br>1.24) | 0.128  | 78.3 | <0.001 | 1.30 (1.01,<br>1.65) | 0.039  | 71.3 | 0.004 | 1.26 (1.09,<br>1.46) | 0.001  | 21.1 | 0.275 | 1.28 (1.06,<br>1.53) | 0.010  | 55.2 | 0.048 | 1.09 (0.94,<br>1.27) | 0.239  | 74.1 | 0.002 |
| Sensitivity analysis |   |               |                      |        |      |        |                      |        |      |       |                      |        |      |       |                      |        |      |       |                      |        |      |       |
| Maximal              | 8 | -/-           | 1.10 (1.00,<br>1.22) | 0.057  | 56.0 | 0.026  | 1.27 (1.02,<br>1.58) | 0.031  | 51.6 | 0.043 | 1.15 (0.97,<br>1.38) | 0.115  | 32.5 | 0.169 | 1.20 (1.01,<br>1.43) | 0.038  | 35.8 | 0.143 | 1.12 (0.97,<br>1.30) | 0.114  | 61.6 | 0.011 |
| Minimal              | 8 | -/-           | 1.18 (1.07,<br>1.30) | 0.001  | 59.9 | 0.015  | 1.47 (1.25,<br>1.73) | <0.001 | 33.1 | 0.164 | 1.27 (1.13,<br>1.43) | <0.001 | 0.0  | 0.445 | 1.28 (1.10,<br>1.51) | 0.002  | 41.5 | 0.521 | 1.23 (1.05,<br>1.44) | 0.008  | 70.4 | 0.001 |
| rs2074196            |   |               |                      |        |      |        |                      |        |      |       |                      |        |      |       |                      |        |      |       |                      |        |      |       |
| Influential analysis |   |               |                      |        |      |        |                      |        |      |       |                      |        |      |       |                      |        |      |       |                      |        |      |       |
| Maximal              | 4 | -/-           | 1.29 (1.20,<br>1.38) | <0.001 | 41.0 | 0.166  | 1.70 (1.49,<br>1.94) | <0.001 | 25.1 | 0.261 | 1.31 (1.19,<br>1.44) | <0.001 | 0.0  | 0.745 | 1.48 (1.35,<br>1.62) | <0.001 | 0.0  | 0.513 | 1.34 (1.23,<br>1.46) | <0.001 | 30.6 | 0.229 |
| Minimal              | 4 | -/-           | 1.35 (1.28,<br>1.41) | <0.001 | 0.0  | 0.612  | 1.83 (1.65,<br>2.04) | <0.001 | 0.0  | 0.775 | 1.37 (1.24,<br>1.52) | <0.001 | 0.0  | 0.634 | 1.56 (1.41,<br>1.71) | <0.001 | 0.0  | 0.672 | 1.40 (1.29,<br>1.53) | <0.001 | 37.2 | 0.189 |

CI: Confidence interval

<sup>a</sup> Number of comparisons

<sup>b</sup> *P*-value of Z-test for significant test

<sup>c</sup> *P*-value of Q-test for between-study heterogeneity test

**supplemental Table 4** The meta-regression analysis of *KCNQ1* gene homozygous on T2DM

|                  | Coefficient | Standard error | t     | P value      | 95% CI of intercept      |
|------------------|-------------|----------------|-------|--------------|--------------------------|
| <b>rs2237892</b> |             |                |       |              |                          |
| N                | -0.0000149  | 0.0000137      | -1.09 | 0.282        | (-0.0000426, 0.0000128)  |
| Control source   | 0.0145201   | 0.1043601      | 0.14  | 0.890        | (-0.1967458, 0.225786)   |
| Publication year | -0.0061387  | 0.0165013      | -0.37 | 0.712        | (-0.0395439, 0.0272666)  |
| Age              | 0.0010279   | 0.0087         | 0.12  | 0.907        | (-0.0166725, 0.0187283)  |
| Ethnicity        | -0.2705131  | 0.1275828      | -2.12 | <b>0.041</b> | (-0.528791, -0.0122353)  |
| Score            | -0.0216028  | 0.0254766      | -0.85 | 0.402        | (-0.0731775, 0.0299719)  |
| HWE              | 0.1810266   | 0.1870884      | 0.97  | 0.339        | (-0.1977141, 0.5597673)  |
| <b>rs2237895</b> |             |                |       |              |                          |
| N                | 0.0000209   | 0.0000152      | 1.37  | 0.185        | (-0.0000108, 0.0000525)  |
| Control source   | -0.0552132  | 0.118778       | -0.46 | 0.647        | (-0.3022255, 0.1917991)  |
| Publication year | -0.0436679  | 0.0203493      | -2.15 | <b>0.044</b> | (-0.0859865, -0.0013493) |
| Age              | 0.0002093   | 0.0097558      | 0.02  | 0.983        | (-0.0204721, -0.0204721) |
| Ethnicity        | -0.2668295  | 0.0917712      | -2.91 | <b>0.008</b> | (-0.4576782, -0.0759809) |
| Score            | 0.0240586   | 0.0311911      | 0.77  | 0.449        | (-0.040807, 0.0889241)   |
| HWE              | -0.0246308  | 0.2712333      | -0.09 | 0.929        | (-0.5886912, 0.5394296)  |
| <b>rs2237897</b> |             |                |       |              |                          |
| N                | 0.0000461   | 0.0000784      | 0.59  | 0.571        | (-0.0001312, 0.0002235)  |
| Control source   | -0.195589   | 0.3597079      | -0.54 | 0.600        | (-1.009305, 0.6181268)   |
| Publication year | -0.0944947  | 0.0705882      | -1.34 | 0.214        | (-0.2541763, 0.065187)   |
| Age              | -0.0073832  | 0.0408886      | -0.18 | 0.863        | (-0.107434, 0.0926675)   |
| Ethnicity        | 0.6293816   | 0.8635118      | 0.73  | 0.485        | (-1.324018, 2.582781)    |
| Score            | 0.0482924   | 0.0813932      | 0.59  | 0.568        | (-0.1358318, 0.2324166)  |
| HWE              | 0.0463805   | 0.4222846      | 0.11  | 0.915        | (-0.9088937, 1.001655)   |
| <b>rs2283228</b> |             |                |       |              |                          |
| N                | -0.0000209  | 0.0000513      | -0.41 | 0.694        | (-0.0001392, 0.0000973)  |
| Control source   | -0.0301486  | 0.3143583      | -0.10 | 0.926        | (-0.7550602, 0.694763)   |
| Publication year | 0.0246078   | 0.0554848      | 0.44  | 0.669        | (-0.1033404, 0.1525561)  |
| Age              | 0.0483061   | 0.042533       | 1.14  | 0.299        | (-0.0557706, 0.1523829)  |
| Ethnicity        | -0.2017557  | 0.3257576      | -0.62 | 0.553        | (-0.9529542, 0.5494428)  |
| Score            | -0.020264   | 0.1070768      | -0.19 | 0.855        | (-0.2671834, 0.2266555)  |
| HWE              | -0.6400612  | 0.3358988      | -1.91 | 0.093        | (-1.414645, 0.1345229)   |
| <b>rs231362</b>  |             |                |       |              |                          |
| N                | -0.0002959  | 0.000208       | -1.42 | 0.198        | (-0.0007877, 0.0001959)  |
| Control source   | -0.0156146  | 0.6932902      | -0.02 | 0.983        | (-1.654985, 1.623756)    |
| Publication year | 0.1013156   | 0.127708       | 0.79  | 0.454        | (-0.2006658, 0.403297)   |
| Age              | -0.1128555  | 0.0575861      | -1.96 | 0.107        | (-0.2608853, 0.0351743)  |
| Ethnicity        | -0.3716854  | 0.7474098      | -0.50 | 0.634        | (-2.139029, 1.395658)    |



|                  |            |           |       |              |                         |
|------------------|------------|-----------|-------|--------------|-------------------------|
| Score            | -0.1932001 | 0.1591486 | -1.21 | 0.264        | (-0.5695267, 0.1831266) |
| HWE              | 1.381958   | 1.01491   | 1.36  | 0.216        | (-1.017922, 3.781838)   |
| <b>rs151290</b>  |            |           |       |              |                         |
| N                | 9.75e-06   | 0.0000566 | 0.17  | 0.868        | (-0.0001241, 0.0001436) |
| Control source   | -0.3452573 | 0.2034566 | -1.70 | 0.134        | (-0.8263557, 0.1358412) |
| Publication year | -0.0292026 | 0.0355577 | -0.82 | 0.439        | (-0.1132832, 0.0548781) |
| Age              | 0.0292181  | 0.0247505 | 1.18  | 0.282        | (-0.0313442, 0.0897804) |
| Ethnicity        | -0.4198043 | 0.184458  | -2.28 | <b>0.057</b> | (-0.8559781, 0.0163696) |
| Score            | 0.0343289  | 0.0376308 | 0.91  | 0.392        | (-0.0546538, 0.1233116) |
| HWE              | -0.1654653 | 0.4434893 | -0.37 | 0.720        | (-1.214151, 0.8832203)  |

N total number of participants

**supplementary Table 5** Publication bias tests (Egger's funnel plot for publication bias test) for *KCNQ1* gene seven polymorphisms

| Genetic type            | Coefficient | Standard error | t     | P value | 95%CI of intercept |
|-------------------------|-------------|----------------|-------|---------|--------------------|
| <b>rs2237892</b>        |             |                |       |         |                    |
| Allelic contrast        | -1.078      | 0.788          | -1.37 | 0.179   | -2.671, 0.516      |
| Homozygote comparison   | -0.521      | 0.590          | -0.88 | 0.382   | -1.715, 0.672      |
| Heterozygote comparison | 0.120       | 0.353          | 0.34  | 0.737   | -0.595, 0.834      |
| Dominant genetic model  | -0.223      | 0.496          | -0.45 | 0.656   | -1.226, 0.781      |
| Recessive genetic model | -1.119      | 0.764          | -1.47 | 0.151   | -2.662, 0.424      |
| <b>rs2237895</b>        |             |                |       |         |                    |
| Allelic contrast        | -0.527      | 0.849          | -0.62 | 0.541   | -2.293, 1.239      |
| Homozygote comparison   | -0.611      | 0.784          | -0.78 | 0.445   | -2.242, 1.020      |
| Heterozygote comparison | -0.085      | 0.612          | -0.14 | 0.891   | -1.358, 1.188      |
| Dominant genetic model  | -0.355      | 0.750          | -0.47 | 0.641   | -1.914, 1.204      |
| Recessive genetic model | -0.603      | 0.636          | -0.95 | 0.354   | -1.925, 0.719      |
| <b>rs2237897</b>        |             |                |       |         |                    |
| Allelic contrast        | 11.800      | 8.888          | 1.33  | 0.214   | -8.004, 31.605     |
| Homozygote comparison   | 8.520       | 6.604          | 1.29  | 0.229   | -6.42, 23.460      |
| Heterozygote comparison | 0.806       | 1.441          | 0.56  | 0.590   | -2.453, 4.065      |
| Dominant genetic model  | 6.149       | 3.512          | 1.75  | 0.114   | -1.795, 14.093     |
| Recessive genetic model | 6.847       | 6.675          | 1.03  | 0.329   | -8.025, 21.719     |
| <b>rs2283228</b>        |             |                |       |         |                    |
| Allelic contrast        | 0.227       | 1.431          | 0.16  | 0.878   | -3.073, 3.528      |
| Homozygote comparison   | 0.435       | 0.751          | 0.58  | 0.579   | -1.298, 2.167      |
| Heterozygote comparison | 0.038       | 0.367          | 0.10  | 0.921   | -0.809, 0.884      |
| Dominant genetic model  | 0.259       | 0.557          | 0.46  | 0.655   | -1.026, 1.544      |
| Recessive genetic model | 0.374       | 1.529          | 0.24  | 0.813   | -3.151, 3.899      |
| <b>rs231362</b>         |             |                |       |         |                    |
| Allelic contrast        | 2.218       | 4.119          | 0.54  | 0.607   | -7.523, 11.959     |
| Homozygote comparison   | 0.126       | 1.460          | 0.09  | 0.933   | -3.325, 3.578      |
| Heterozygote comparison | 0.041       | 0.807          | 0.05  | 0.961   | -1.868, 1.950      |
| Dominant genetic model  | 0.029       | 1.170          | 0.03  | 0.981   | -2.736, 2.795      |
| Recessive genetic model | 3.167       | 3.587          | 0.88  | 0.407   | -5.315, 11.649     |
| <b>rs151290</b>         |             |                |       |         |                    |
| Allelic contrast        | 0.077       | 1.497          | 0.05  | 0.960   | -3.463, 3.618      |
| Homozygote comparison   | -1.066      | 1.391          | -0.77 | 0.468   | -4.354, 2.222      |
| Heterozygote comparison | -1.820      | 0.856          | -2.13 | 0.071   | -3.843, 0.204      |
| Dominant genetic model  | -1.875      | 0.996          | -1.88 | 0.102   | -4.231, 0.481      |
| Recessive genetic model | 1.083       | 1.336          | 0.81  | 0.444   | -2.076, 4.242      |
| <b>rs2074196</b>        |             |                |       |         |                    |
| Allelic contrast        | 0.502       | 1.791          | 0.28  | 0.798   | -5.199, 6.202      |
| Homozygote comparison   | -0.131      | 1.199          | -0.11 | 0.920   | -3.947, 3.686      |
| Heterozygote comparison | 0.614       | 1.688          | 0.36  | 0.740   | -4.758, 5.987      |
| Dominant genetic model  | 1.085       | 2.107          | 0.51  | 0.642   | -5.621, 7.791      |
| Recessive genetic model | -0.365      | 1.008          | -0.36 | 0.742   | -3.573, 2.844      |
